# Supplementary material for: Solar cells based on 2D Janus group-III chalcogenide van der Waals heterostructures
Source: Royal Society of Chemistry journal article supplement (doi:10.1039/d2nr06200c), 2023-01-01
Supplement: d2nr06200c1.pdf [file d2nr06200c1.pdf]

**Supplementary materials for**  
**Solar cells based on 2D Janus group-III chalcogenide van der Waals**  
**heterostructures**

M. Bikerouin\*, O. Chdil, M. Balli\*\*

AMEEC team, LERMA, College of Engineering and Architecture, International University of Rabat, parc  
Technopolis, Rocade de Rabat-Salé, 11100, Morocco.

\*Email: [mouad.bikerouin@uir.ac.ma](mailto:mouad.bikerouin@uir.ac.ma)

\*\*Email: [mohamed.balli@uir.ac.ma](mailto:mohamed.balli@uir.ac.ma)

## Text S1. Formalism for the calculation of the mechanical properties

- The Young modulus:

$$\Upsilon = \frac{C_{11}^2 - C_{12}^2}{C_{11}} \quad (1)$$

- The Poisson ratio:

$$\nu = \frac{C_{12}}{C_{11}} \quad (2)$$

- The 2D layer modulus:

$$\gamma^{2D} = \frac{C_{11} + C_{12}}{2} \quad (3)$$

- The intrinsic strength:

$$\sigma_{int} \simeq \frac{\Upsilon}{9} \quad (4)$$

- The bending modulus:

$$D = \frac{\Upsilon h^2}{12(1 - \nu^2)} \quad (5)$$

where  $h$  is the nanosheet thickness.

## Text S2. Formalism for the calculation of the cohesive energy and the heat of formation

Cohesive energy ( $E_{coh}$ ) of MM'XY monolayer is calculated using the following formula [1],

$$E_c = \frac{N_M E_M^{iso} + N_{M'} E_{M'}^{iso} + N_X E_X^{iso} + N_Y E_Y^{iso} - E_{MM'XY}}{N_M + N_{M'} + N_X + N_Y}, \quad (6)$$

where  $E_{MM'XY}$  refers to the total energy of the MM'XY monolayer,  $E_M^{iso}$ ,  $E_{M'}^{iso}$ ,  $E_X^{iso}$ , and  $E_Y^{iso}$  represent the single atom energies of M, M', X, and Y elements, respectively, and  $N_M$ ,  $N_{M'}$ ,  $N_X$ , and  $N_Y$  stand for the number of corresponding elements in the unit cell.

The heat of formation ( $\Delta H$ ) of MM'XY monolayer is determined using the following equation [2],

$$\Delta H = \frac{E_{MM'XY} - n_M E_M^{ss} - n_{M'} E_{M'}^{ss} - n_X E_X^{ss} - n_Y E_Y^{ss}}{n}, \quad (7)$$

where  $E_{MM'XY}$  is to the total energy of the MM'XY monolayer,  $E_M^{ss}$ ,  $E_{M'}^{ss}$ ,  $E_X^{ss}$ , and  $E_Y^{ss}$  are the energies of the M, M', X, and Y atoms in their solid phase, respectively;  $n_M$ ,  $n_{M'}$ ,  $n_X$ , and  $n_Y$  represent the numbers of atoms for each element in the unit cell of MM'XY, and  $n$  is the total number of atoms in the unit cell.

**Table S1.** Calculated lattice parameter ( $a$ ), bond lengths ( $d_{M-X}$ ,  $d_{M'-Y}$ , and  $d_{M-M'}$ ), thickness ( $h$ ), band gaps using HSE ( $E_g^{\text{HSE}}$ ) and HSE+SOC ( $E_g^{\text{HSE+SOC}}$ ) exchange-correlation potentials, potential energy difference ( $\Delta\phi$ ), and dipole moment (P) of MX,  $M_2XY$ ,  $MM'X_2$ , and  $MM'XY$  (M, M' = Ga, In; X, Y = S, Se, Te) monolayers.

| Type     | Materials            | $a$<br>(Å) | $d_{M-X}$<br>(Å) | $d_{M'-Y}$<br>(Å) | $d_{M-M'}$<br>(Å) | $h$<br>(Å) | $E_g^{\text{HSE}}$<br>(eV) | $E_g^{\text{HSE+SOC}}$<br>(eV) | $\Delta\phi$<br>(eV) | P<br>(Debye) |
|----------|----------------------|------------|------------------|-------------------|-------------------|------------|----------------------------|--------------------------------|----------------------|--------------|
| MX       | GaS                  | 3.57       | 2.34             | 2.34              | 2.44              | 4.64       | 3.47                       | 3.47                           | 0                    | 0            |
|          | GaSe                 | 3.74       | 2.47             | 2.47              | 2.43              | 4.82       | 3.12                       | 3.08                           | 0                    | 0            |
|          | GaTe                 | 4.05       | 2.67             | 2.67              | 2.43              | 5.01       | 2.34                       | 2.02                           | 0                    | 0            |
|          | InS                  | 3.79       | 2.52             | 2.52              | 2.79              | 5.28       | 3.07                       | 3.07                           | 0                    | 0            |
|          | InSe                 | 3.93       | 2.64             | 2.64              | 2.78              | 5.48       | 2.81                       | 2.70                           | 0                    | 0            |
|          | InTe                 | 4.23       | 2.84             | 2.84              | 2.78              | 5.69       | 2.35                       | 1.99                           | 0                    | 0            |
| $M_2XY$  | Ga <sub>2</sub> SSe  | 3.66       | 2.36             | 2.44              | 2.43              | 4.73       | 3.29                       | 3.12                           | 0.25                 | 0.07         |
|          | Ga <sub>2</sub> STe  | 3.83       | 2.42             | 2.61              | 2.43              | 4.80       | 1.59                       | 1.26                           | 0.57                 | 0.19         |
|          | Ga <sub>2</sub> SeTe | 3.91       | 2.52             | 2.63              | 2.43              | 4.91       | 2.01                       | 1.69                           | 0.34                 | 0.12         |
|          | In <sub>2</sub> SSe  | 3.86       | 2.53             | 2.63              | 2.79              | 5.38       | 2.69                       | 2.53                           | 0.22                 | 0.08         |
|          | In <sub>2</sub> STe  | 4.02       | 2.57             | 2.80              | 2.79              | 5.47       | 1.41                       | 1.09                           | 0.48                 | 0.18         |
|          | In <sub>2</sub> SeTe | 4.09       | 2.68             | 2.81              | 2.78              | 5.58       | 1.81                       | 1.48                           | 0.28                 | 0.11         |
| $MM'X_2$ | GaInS <sub>2</sub>   | 3.68       | 2.37             | 2.49              | 2.61              | 4.98       | 3.13                       | 3.12                           | 0.40                 | 0.12         |
|          | GaInSe <sub>2</sub>  | 3.82       | 2.49             | 2.62              | 2.61              | 5.17       | 2.52                       | 2.35                           | 0.27                 | 0.09         |
|          | GaInTe <sub>2</sub>  | 4.13       | 2.70             | 2.82              | 2.60              | 5.37       | 1.97                       | 1.61                           | 0.15                 | 0.06         |
| $MM'XY$  | GaInSSe              | 3.74       | 2.39             | 2.60              | 2.61              | 5.09       | 2.13                       | 1.96                           | 0.08                 | 0.03         |
|          | GaInSTe              | 3.90       | 2.44             | 2.78              | 2.61              | 5.20       | 0.53                       | 0.22                           | 0.36                 | 0.13         |
|          | GaInSeTe             | 3.98       | 2.54             | 2.79              | 2.61              | 5.29       | 1.02                       | 0.70                           | 0.16                 | 0.05         |
|          | InGaSSe              | 3.76       | 2.51             | 2.48              | 2.61              | 5.06       | 3.04                       | 3.01                           | 0.56                 | 0.18         |
|          | InGaSTe              | 3.94       | 2.55             | 2.64              | 2.61              | 5.11       | 2.31                       | 1.99                           | 0.73                 | 0.26         |
|          | InGaSeTe             | 4.00       | 2.65             | 2.66              | 2.61              | 5.24       | 2.57                       | 2.23                           | 0.50                 | 0.18         |

**Table S2.** Calculated cohesive energy ( $E_{coh}$ ), heat of formation ( $\Delta H$ ), and energy above the convex hull ( $\Delta H_{hull}$ ), as well as the thermodynamic stability indicator of MX,  $M_2XY$ ,  $MM'X_2$ , and  $MM'XY$  (M, M' = Ga, In; X, Y = S, Se, Te) monolayers. The thermodynamic stability criterion is defined as follows [3]: low ( $\Delta H > 0.2$  eV/atom), medium ( $\Delta H < 0.2$  eV/atom and  $\Delta H_{hull} > 0.2$  eV/atom), and high ( $\Delta H < 0.2$  eV/atom and  $\Delta H_{hull} < 0.2$  eV/atom).

| Type     | Materials            | $E_{coh}$<br>(eV/atom) | $\Delta H$<br>(eV/atom) | $\Delta H_{hull}$<br>(eV/atom) | Thermodynamic<br>stability |
|----------|----------------------|------------------------|-------------------------|--------------------------------|----------------------------|
| MX       | GaS                  | 3.61                   | -0.66                   | 0.01                           | High                       |
|          | GaSe                 | 3.32                   | -0.59                   | 0.01                           | High                       |
|          | GaTe                 | 2.95                   | -0.35                   | 0.01                           | High                       |
|          | InS                  | 3.31                   | -0.52                   | 0.01                           | High                       |
|          | InSe                 | 3.07                   | -0.50                   | 0.03                           | High                       |
|          | InTe                 | 2.76                   | -0.32                   | 0.02                           | High                       |
| $M_2XY$  | Ga <sub>2</sub> SSe  | 3.46                   | -0.61                   | 0.01                           | High                       |
|          | Ga <sub>2</sub> STe  | 3.21                   | -0.44                   | 0.07                           | High                       |
|          | Ga <sub>2</sub> SeTe | 3.11                   | -0.44                   | 0.03                           | High                       |
|          | In <sub>2</sub> SSe  | 3.18                   | -0.50                   | 0.03                           | High                       |
|          | In <sub>2</sub> STe  | 2.99                   | -0.38                   | 0.06                           | High                       |
|          | In <sub>2</sub> SeTe | 2.90                   | -0.40                   | 0.04                           | High                       |
| $MM'X_2$ | GaInS <sub>2</sub>   | 3.43                   | -0.56                   | 0.04                           | High                       |
|          | GaInSe <sub>2</sub>  | 3.17                   | -0.52                   | 0.04                           | High                       |
|          | GaInTe <sub>2</sub>  | 2.83                   | -0.32                   | 0.04                           | High                       |
| $MM'XY$  | GaInSSe              | 3.28                   | -0.51                   | 0.08                           | High                       |
|          | GaInSTe              | 3.04                   | -0.34                   | 0.16                           | High                       |
|          | GaInSeTe             | 2.96                   | -0.37                   | 0.10                           | High                       |
|          | InGaSSe              | 3.30                   | -0.54                   | 0.05                           | High                       |
|          | InGaSTe              | 3.12                   | -0.42                   | 0.08                           | High                       |
|          | InGaSeTe             | 3.01                   | -0.42                   | 0.05                           | High                       |

**Table S3.** Bader charges (in  $e$ ) of all elements constituting the studied group-III chalcogenides monolayers. Positive Bader charges represent charge accumulation, whereas negative values represent charge depletion.

| MX                  |        |                     |                     |                      |        |                     |        |                     |        |                      |        |
|---------------------|--------|---------------------|---------------------|----------------------|--------|---------------------|--------|---------------------|--------|----------------------|--------|
| GaS                 |        | GaSe                |                     | GaTe                 |        | InS                 |        | InSe                |        | InTe                 |        |
| S                   | 0.840  | Se                  | 0.681               | Te                   | 0.453  | S                   | 0.836  | Se                  | 0.702  | Te                   | 0.517  |
| Ga                  | -0.855 | Ga                  | -0.696              | Ga                   | -0.469 | In                  | -0.849 | In                  | -0.715 | In                   | -0.530 |
| Ga                  | -0.825 | Ga                  | -0.666              | Ga                   | -0.437 | In                  | -0.823 | In                  | -0.689 | In                   | -0.504 |
| S                   | 0.840  | Se                  | 0.681               | Te                   | 0.453  | S                   | 0.836  | Se                  | 0.702  | Te                   | 0.517  |
| M <sub>2</sub> XY   |        |                     |                     |                      |        |                     |        |                     |        |                      |        |
| Ga <sub>2</sub> SSe |        | Ga <sub>2</sub> STe |                     | Ga <sub>2</sub> SeTe |        | In <sub>2</sub> SSe |        | In <sub>2</sub> STe |        | In <sub>2</sub> SeTe |        |
| S                   | 0.841  | S                   | 0.842               | Se                   | 0.683  | S                   | 0.842  | S                   | 0.855  | Se                   | 0.712  |
| Ga                  | -0.837 | Ga                  | -0.853              | Ga                   | -0.687 | In                  | -0.861 | In                  | -0.882 | In                   | -0.710 |
| Ga                  | -0.684 | Ga                  | -0.434              | Ga                   | -0.444 | In                  | -0.677 | In                  | -0.476 | In                   | -0.509 |
| Se                  | 0.680  | Te                  | 0.445               | Te                   | 0.448  | Se                  | 0.696  | Te                  | 0.503  | Te                   | 0.507  |
| MM'X <sub>2</sub>   |        |                     |                     |                      |        |                     |        |                     |        |                      |        |
| GaInS <sub>2</sub>  |        |                     | GaInSe <sub>2</sub> |                      |        | GaInTe <sub>2</sub> |        |                     |        |                      |        |
| S                   | 0.839  |                     | Se                  | 0.680                |        | Te                  | 0.455  |                     |        |                      |        |
| Ga                  | -0.809 |                     | Ga                  | -0.649               |        | Ga                  | -0.421 |                     |        |                      |        |
| In                  | -0.855 |                     | In                  | -0.726               |        | In                  | -0.545 |                     |        |                      |        |
| S                   | 0.825  |                     | Se                  | 0.695                |        | Te                  | 0.511  |                     |        |                      |        |
| MM'XY               |        |                     |                     |                      |        |                     |        |                     |        |                      |        |
| GaInSSe             |        | GaInSTe             |                     | GaInSeTe             |        | InGaSSe             |        | InGaSTe             |        | InGaSeTe             |        |
| S                   | 0.838  | S                   | 0.838               | Se                   | 0.681  | S                   | 0.834  | S                   | 0.850  | Se                   | 0.708  |
| Ga                  | -0.816 | Ga                  | -0.822              | Ga                   | -0.650 | In                  | -0.873 | In                  | -0.903 | In                   | -0.756 |
| In                  | -0.709 | In                  | -0.509              | In                   | -0.532 | Ga                  | -0.640 | Ga                  | -0.394 | Ga                   | -0.402 |
| Se                  | 0.687  | Te                  | 0.493               | Te                   | 0.501  | Se                  | 0.679  | Te                  | 0.447  | Te                   | 0.450  |

**Table S4.** Calculated elastic constants ( $C_{11}$ ,  $C_{12}$ , and  $C_{66}$ ), Young modulus ( $Y$ ), Poisson ratio ( $\nu$ ), layer modulus ( $\gamma^{2D}$ ), intrinsic strength ( $\sigma_{int}$ ), and bending modulus ( $D$ ) of MX,  $M_2XY$ ,  $MM'X_2$ , and  $MM'XY$  ( $M, M' = \text{Ga, In}; X, Y = \text{S, Se, Te}$ ) monolayers.

| Type     | Materials                | $C_{11}$<br>( $\text{N m}^{-1}$ ) | $C_{12}$<br>( $\text{N m}^{-1}$ ) | $C_{66}$<br>( $\text{N m}^{-1}$ ) | $Y$<br>( $\text{N m}^{-1}$ ) | $\nu$ | $\gamma^{2D}$<br>( $\text{N m}^{-1}$ ) | $\sigma_{int}$<br>( $\text{N m}^{-1}$ ) | $D$<br>(eV) |
|----------|--------------------------|-----------------------------------|-----------------------------------|-----------------------------------|------------------------------|-------|----------------------------------------|-----------------------------------------|-------------|
| MX       | GaS                      | 99                                | 25                                | 37                                | 93                           | 0.25  | 62                                     | 10                                      | 11          |
|          | GaSe                     | 83                                | 20                                | 31                                | 78                           | 0.25  | 51                                     | 9                                       | 10          |
|          | GaTe                     | 66                                | 16                                | 25                                | 63                           | 0.23  | 41                                     | 7                                       | 9           |
|          | InS                      | 67                                | 20                                | 23                                | 61                           | 0.30  | 43                                     | 7                                       | 10          |
|          | InSe                     | 55                                | 16                                | 20                                | 51                           | 0.29  | 36                                     | 6                                       | 9           |
|          | InTe                     | 44                                | 12                                | 16                                | 41                           | 0.26  | 28                                     | 5                                       | 8           |
| $M_2XY$  | $\text{Ga}_2\text{SSe}$  | 89                                | 22                                | 34                                | 84                           | 0.25  | 56                                     | 9                                       | 10          |
|          | $\text{Ga}_2\text{STe}$  | 72                                | 17                                | 28                                | 68                           | 0.23  | 44                                     | 8                                       | 9           |
|          | $\text{Ga}_2\text{SeTe}$ | 71                                | 17                                | 27                                | 67                           | 0.23  | 44                                     | 7                                       | 9           |
|          | $\text{In}_2\text{SSe}$  | 61                                | 18                                | 21                                | 55                           | 0.30  | 39                                     | 6                                       | 9           |
|          | $\text{In}_2\text{STe}$  | 53                                | 14                                | 20                                | 49                           | 0.27  | 34                                     | 6                                       | 8           |
|          | $\text{In}_2\text{SeTe}$ | 49                                | 13                                | 18                                | 46                           | 0.27  | 31                                     | 5                                       | 8           |
| $MM'X_2$ | $\text{GaInS}_2$         | 82                                | 23                                | 30                                | 76                           | 0.28  | 53                                     | 8                                       | 11          |
|          | $\text{GaInSe}_2$        | 69                                | 19                                | 25                                | 64                           | 0.27  | 44                                     | 7                                       | 10          |
|          | $\text{GaInTe}_2$        | 55                                | 14                                | 20                                | 51                           | 0.25  | 34                                     | 6                                       | 8           |
| $MM'XY$  | $\text{GaInSSe}$         | 74                                | 21                                | 27                                | 69                           | 0.28  | 48                                     | 8                                       | 10          |
|          | $\text{GaInSTe}$         | 62                                | 16                                | 23                                | 58                           | 0.25  | 39                                     | 6                                       | 9           |
|          | $\text{GaInSeTe}$        | 58                                | 15                                | 22                                | 54                           | 0.26  | 37                                     | 6                                       | 8           |
|          | $\text{InGaSSe}$         | 75                                | 20                                | 27                                | 69                           | 0.27  | 48                                     | 8                                       | 10          |
|          | $\text{InGaSTe}$         | 65                                | 16                                | 24                                | 61                           | 0.25  | 41                                     | 7                                       | 9           |
|          | $\text{InGaSeTe}$        | 61                                | 16                                | 23                                | 57                           | 0.26  | 38                                     | 6                                       | 9           |

**Table S5.** Calculated carrier effective mass ( $m^*$ ), deformation potential constant ( $E_l$ ), and carrier mobility ( $\mu$ ) for electron ( $e$ ) and hole ( $h$ ) along the zigzag ( $x$ ) and armchair ( $y$ ) directions at 300 K in single-layers MX,  $M_2XY$ , and  $MM'X_2$  ( $M, M' = \text{Ga, In}; X, Y = \text{S, Se, Te}$ ).

| Type                 | Materials            | Carrier type | $m_x^*$<br>( $m_0$ ) | $m_y^*$<br>( $m_0$ ) | $E_{lx}$<br>(eV) | $E_{ly}$<br>(eV) | $\mu_x$<br>( $\text{cm}^2 \text{V}^{-1} \text{s}^{-1}$ ) | $\mu_y$<br>( $\text{cm}^2 \text{V}^{-1} \text{s}^{-1}$ ) |
|----------------------|----------------------|--------------|----------------------|----------------------|------------------|------------------|----------------------------------------------------------|----------------------------------------------------------|
| MX                   | GaS                  | Electron     | 0.92                 | 0.32                 | 6.06             | 2.22             | 115.01                                                   | 2463.94                                                  |
|                      |                      | Hole         | 1.78                 | 1.29                 | 2.63             | 3.00             | 113.01                                                   | 119.84                                                   |
|                      | GaSe                 | Electron     | 0.37                 | 0.21                 | 9.03             | 7.90             | 210.19                                                   | 483.85                                                   |
|                      |                      | Hole         | 1.30                 | 1.13                 | 2.24             | 2.64             | 223.59                                                   | 185.18                                                   |
|                      | GaTe                 | Electron     | 0.26                 | 0.22                 | 5.97             | 2.59             | 634.22                                                   | 3982.38                                                  |
|                      |                      | Hole         | 1.33                 | 1.17                 | 3.19             | 2.96             | 83.26                                                    | 109.92                                                   |
|                      | InS                  | Electron     | 0.33                 | 0.18                 | 4.43             | 4.44             | 904.02                                                   | 1649.92                                                  |
|                      |                      | Hole         | 2.30                 | 1.23                 | 3.02             | 3.31             | 40.44                                                    | 62.95                                                    |
|                      | InSe                 | Electron     | 0.26                 | 0.18                 | 5.13             | 5.13             | 791.32                                                   | 1143.01                                                  |
|                      |                      | Hole         | 1.60                 | 1.05                 | 1.81             | 1.57             | 172.40                                                   | 349.17                                                   |
| InTe                 | Electron             | 0.35         | 0.22                 | 3.78                 | 1.73             | 675.27           | 5128.75                                                  |                                                          |
|                      | Hole                 | 0.79         | 0.70                 | 5.53                 | 5.36             | 52.16            | 62.66                                                    |                                                          |
| $M_2XY$              | Ga <sub>2</sub> SSe  | Electron     | 0.36                 | 0.21                 | 8.55             | 3.58             | 261.95                                                   | 2561.31                                                  |
|                      |                      | Hole         | 0.89                 | 0.79                 | 4.84             | 4.53             | 108.42                                                   | 139.44                                                   |
|                      | Ga <sub>2</sub> STe  | Electron     | 0.26                 | 0.21                 | 6.02             | 6.03             | 696.45                                                   | 859.41                                                   |
|                      |                      | Hole         | 0.53                 | 0.24                 | 8.62             | 8.35             | 109.17                                                   | 256.94                                                   |
|                      | Ga <sub>2</sub> SeTe | Electron     | 0.18                 | 0.12                 | 7.25             | 6.62             | 1087.43                                                  | 1956.38                                                  |
|                      |                      | Hole         | 0.57                 | 0.28                 | 7.84             | 7.60             | 108.03                                                   | 234.03                                                   |
|                      | In <sub>2</sub> SSe  | Electron     | 0.30                 | 0.17                 | 4.73             | 4.74             | 857.08                                                   | 1506.11                                                  |
|                      |                      | Hole         | 0.95                 | 0.60                 | 5.34             | 5.17             | 63.52                                                    | 107.29                                                   |
|                      | In <sub>2</sub> STe  | Electron     | 0.29                 | 0.16                 | 4.50             | 4.50             | 892.30                                                   | 1617.30                                                  |
|                      |                      | Hole         | 0.65                 | 0.28                 | 7.12             | 6.91             | 80.29                                                    | 197.90                                                   |
| In <sub>2</sub> SeTe | Electron             | 0.25         | 0.18                 | 5.32                 | 5.33             | 695.26           | 962.01                                                   |                                                          |
|                      | Hole                 | 0.68         | 0.30                 | 6.75                 | 6.55             | 74.57            | 179.51                                                   |                                                          |
| $MM'X_2$             | GaInS <sub>2</sub>   | Electron     | 0.31                 | 0.28                 | 6.93             | 6.55             | 398.15                                                   | 493.44                                                   |
|                      |                      | Hole         | 1.32                 | 1.15                 | 2.61             | 2.36             | 157.63                                                   | 221.30                                                   |
|                      | GaInSe <sub>2</sub>  | Electron     | 0.24                 | 0.22                 | 7.16             | 7.18             | 519.77                                                   | 563.87                                                   |
|                      |                      | Hole         | 0.94                 | 0.49                 | 6.50             | 6.32             | 54.52                                                    | 110.63                                                   |
|                      | GaInTe <sub>2</sub>  | Electron     | 0.32                 | 0.27                 | 5.28             | 2.27             | 446.69                                                   | 2864.24                                                  |
|                      |                      | Hole         | 0.71                 | 0.34                 | 6.72             | 6.63             | 74.36                                                    | 159.52                                                   |



**Table S6.** Calculated carrier effective mass ( $m^*$ ), deformation potential constant ( $E_l$ ), and carrier mobility ( $\mu$ ) for electron ( $e$ ) and hole ( $h$ ) along the zigzag ( $x$ ) and armchair ( $y$ ) directions at 300 K in single-layers MM'XY (M, M' = Ga, In; X, Y = S, Se, Te).

| Type  | Materials | Carrier type | $m_x^*$<br>( $m_0$ ) | $m_y^*$<br>( $m_0$ ) | $E_{lx}$<br>(eV) | $E_{ly}$<br>(eV) | $\mu_x$<br>( $\text{cm}^2 \text{V}^{-1} \text{s}^{-1}$ ) | $\mu_y$<br>( $\text{cm}^2 \text{V}^{-1} \text{s}^{-1}$ ) |
|-------|-----------|--------------|----------------------|----------------------|------------------|------------------|----------------------------------------------------------|----------------------------------------------------------|
| MM'XY | GaInSSe   | Electron     | 0.27                 | 0.21                 | 6.72             | 6.73             | 542.82                                                   | 695.84                                                   |
|       |           | Hole         | 0.91                 | 0.37                 | 7.23             | 7.03             | 57.10                                                    | 148.53                                                   |
|       | GaInSTe   | Electron     | 0.32                 | 0.15                 | 7.12             | 7.04             | 371.52                                                   | 810.69                                                   |
|       |           | Hole         | 0.61                 | 0.26                 | 7.76             | 7.21             | 90.26                                                    | 245.31                                                   |
|       | GaInSeTe  | Electron     | 0.21                 | 0.15                 | 5.81             | 5.82             | 981.79                                                   | 1369.79                                                  |
|       |           | Hole         | 0.64                 | 0.28                 | 8.35             | 8.12             | 65.39                                                    | 158.05                                                   |
|       | InGaSSe   | Electron     | 0.33                 | 0.24                 | 7.07             | 7.08             | 344.08                                                   | 471.78                                                   |
|       |           | Hole         | 1.68                 | 1.08                 | 2.64             | 3.02             | 101.27                                                   | 120.39                                                   |
|       | InGaSTe   | Electron     | 0.49                 | 0.28                 | 6.10             | 5.45             | 204.97                                                   | 449.37                                                   |
|       |           | Hole         | 0.58                 | 0.32                 | 6.62             | 6.38             | 126.41                                                   | 246.69                                                   |
|       | InGaSeTe  | Electron     | 0.59                 | 0.30                 | 5.67             | 2.10             | 162.80                                                   | 2334.00                                                  |
|       |           | Hole         | 0.82                 | 0.75                 | 6.18             | 5.98             | 52.90                                                    | 61.77                                                    |

**Table S7.** Calculated lattice parameter ( $a$ ), interlayer distance ( $d$ ), thickness ( $h$ ), binding energy ( $E_b$ ), bandgap using HSE functional ( $E_g^{\text{HSE}}$ ), potential energy difference ( $\Delta\phi$ ), and dipole moment ( $P$ ) of different stacking configurations of Ga<sub>2</sub>STe/GaInS<sub>2</sub> van der Waals (vdW) heterostructure.

| Stacking | Patterns | $a$<br>(Å) | $d$<br>(Å) | $h$<br>(Å) | $E_b$<br>(eV) | $E_g^{\text{HSE}}$<br>(eV) | $\Delta\phi$<br>(eV) | $P$<br>(Debye) |
|----------|----------|------------|------------|------------|---------------|----------------------------|----------------------|----------------|
| AA       | P1       | 3.75       | 3.74       | 13.52      | -0.099        | 0.98                       | 0.29                 | 0.09           |
|          | P2       | 3.75       | 3.82       | 13.60      | -0.089        | 1.25                       | 0.87                 | 0.28           |
|          | P3       | 3.75       | 3.85       | 13.63      | -0.137        | 0.54                       | 0.68                 | 0.22           |
|          | P4       | 3.75       | 3.91       | 13.70      | -0.123        | 0.81                       | 0.21                 | 0.07           |
| AB       | P1       | 3.76       | 3.01       | 12.77      | -0.165        | 0.97                       | 0.28                 | 0.09           |
|          | P2       | 3.76       | 3.05       | 12.81      | -0.154        | 1.27                       | 0.88                 | 0.28           |
|          | P3       | 3.76       | 3.16       | 12.93      | -0.225        | 0.64                       | 0.64                 | 0.21           |
|          | P4       | 3.76       | 3.21       | 12.98      | -0.205        | 0.91                       | 0.14                 | 0.05           |
| AC       | P1       | 3.75       | 3.74       | 13.53      | -0.100        | 0.98                       | 0.29                 | 0.09           |
|          | P2       | 3.75       | 3.82       | 13.60      | -0.089        | 1.25                       | 0.87                 | 0.28           |
|          | P3       | 3.75       | 3.84       | 13.63      | -0.138        | 0.54                       | 0.68                 | 0.22           |
|          | P4       | 3.75       | 3.91       | 13.69      | -0.123        | 0.81                       | 0.21                 | 0.07           |
| AD       | P1       | 3.76       | 3.00       | 12.75      | -0.163        | 0.97                       | 0.27                 | 0.09           |
|          | P2       | 3.76       | 3.02       | 12.78      | -0.154        | 1.24                       | 0.87                 | 0.28           |
|          | P3       | 3.76       | 3.15       | 12.92      | -0.223        | 0.66                       | 0.63                 | 0.20           |
|          | P4       | 3.76       | 3.18       | 12.95      | -0.207        | 0.94                       | 0.11                 | 0.04           |
| AE       | P1       | 3.76       | 2.96       | 12.72      | -0.162        | 0.98                       | 0.28                 | 0.09           |
|          | P2       | 3.76       | 2.98       | 12.74      | -0.153        | 1.23                       | 0.87                 | 0.28           |
|          | P3       | 3.76       | 3.17       | 12.94      | -0.215        | 0.65                       | 0.63                 | 0.21           |
|          | P4       | 3.76       | 3.20       | 12.97      | -0.199        | 0.92                       | 0.12                 | 0.04           |
| AF       | P1       | 3.76       | 2.97       | 12.72      | -0.167        | 0.99                       | 0.28                 | 0.09           |
|          | P2       | 3.76       | 3.01       | 12.77      | -0.155        | 1.27                       | 0.89                 | 0.29           |
|          | P3       | 3.76       | 3.17       | 12.94      | -0.221        | 0.64                       | 0.64                 | 0.21           |
|          | P4       | 3.76       | 3.22       | 12.99      | -0.201        | 0.90                       | 0.15                 | 0.05           |

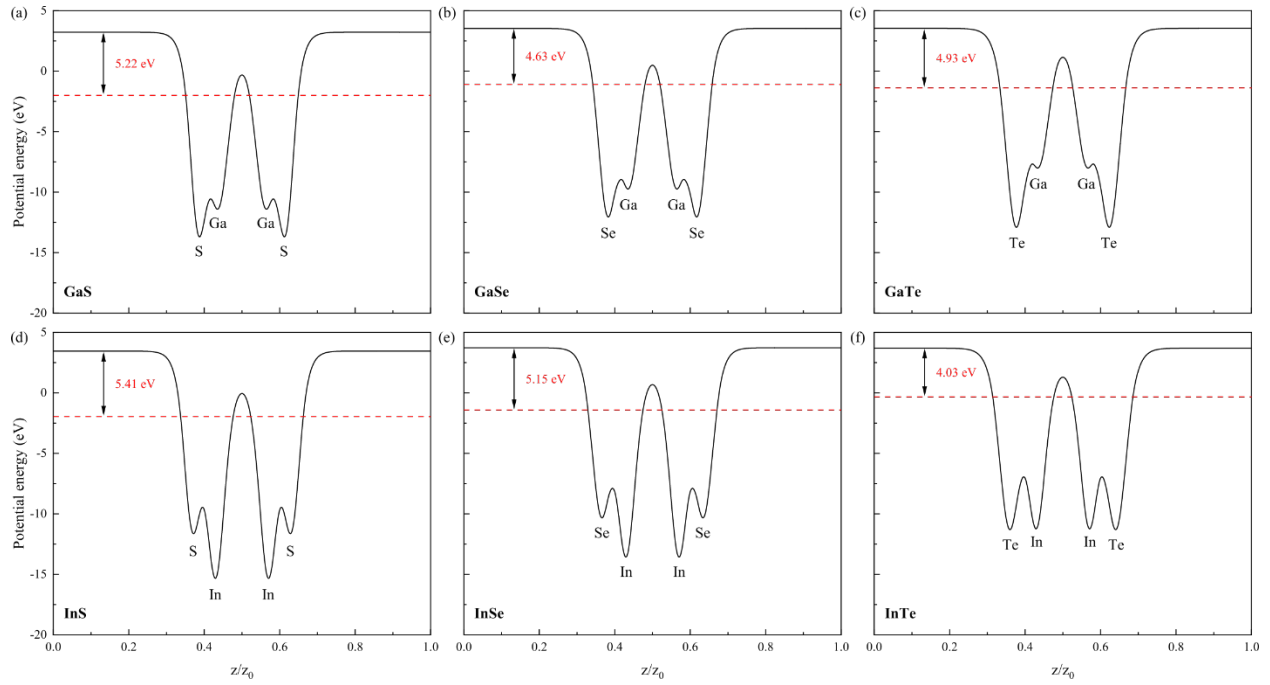

**Figure S1.** The plane-averaged electrostatic potential of monolayer (a) GaS, (b) GaSe, (c) GaTe, (d) InS, (e) InSe, and (f) InTe.

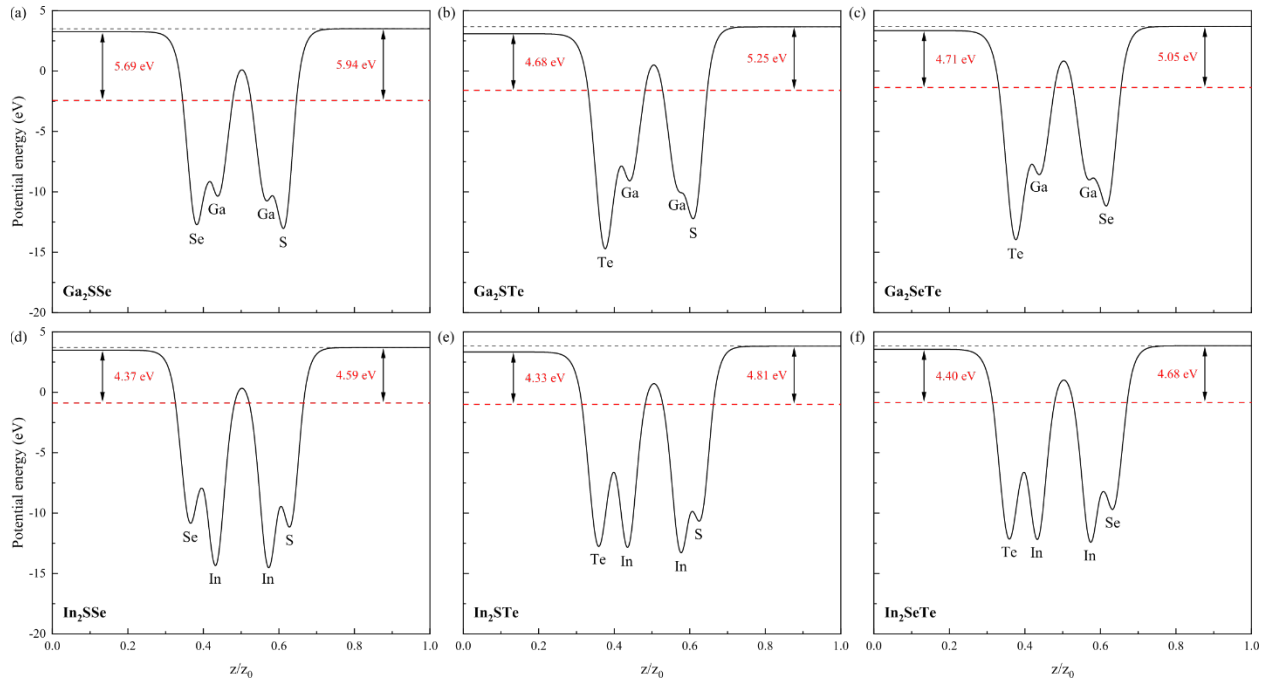

**Figure S2.** The plane-averaged electrostatic potential of monolayer (a) Ga<sub>2</sub>SSe, (b) Ga<sub>2</sub>STe, (c) Ga<sub>2</sub>SeTe, (d) In<sub>2</sub>SSe, (e) In<sub>2</sub>STe, and (f) In<sub>2</sub>SeTe.

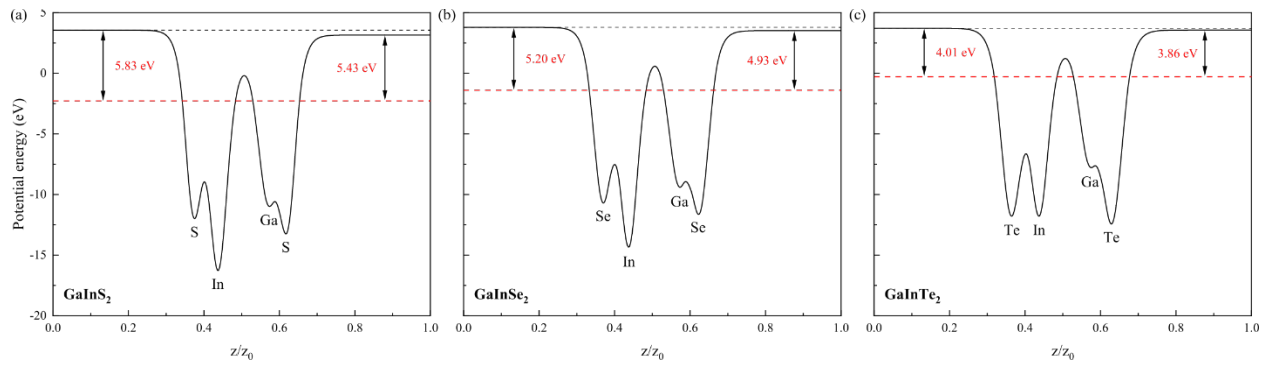

**Figure S3.** The plane-averaged electrostatic potential of monolayer (a) GaInS<sub>2</sub>, (b) GaInSe<sub>2</sub>, and (c) GaInTe<sub>2</sub>.

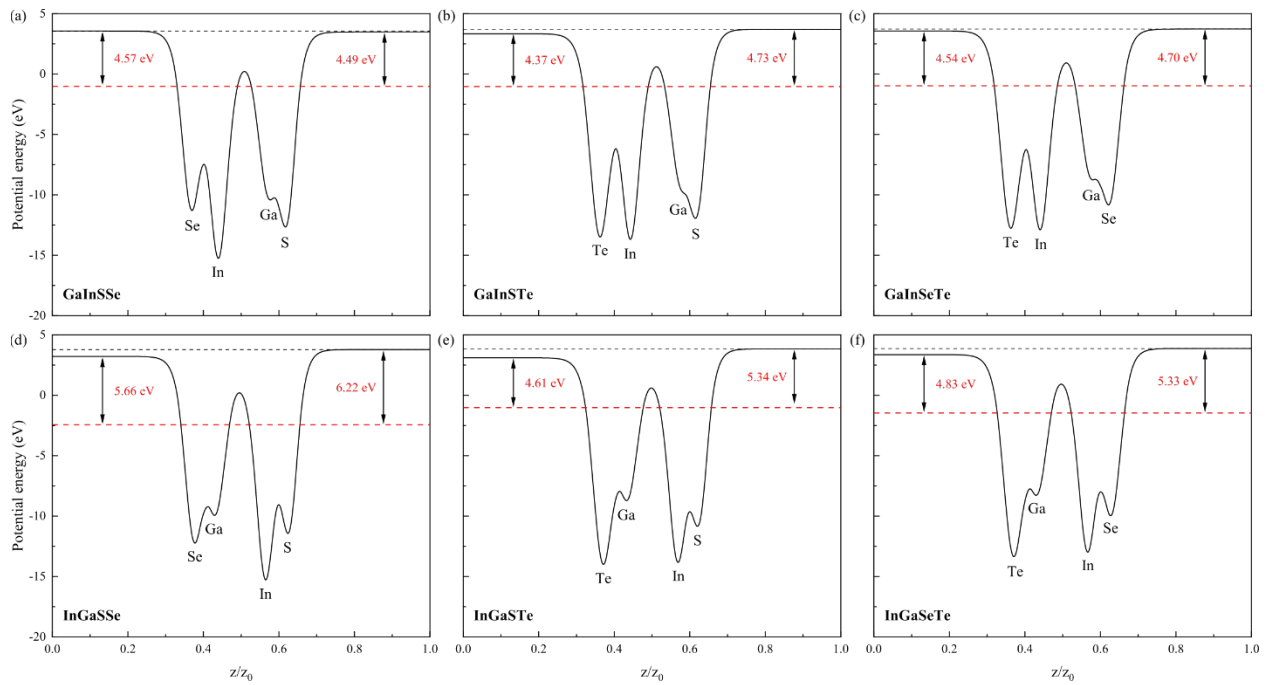

**Figure S4.** The plane-averaged electrostatic potential of monolayer (a) GaInSSe, (b) GaInSTe, (c) GaInSeTe, (d) InGaSSe, (e) InGaSTe, and (f) InGaSeTe.

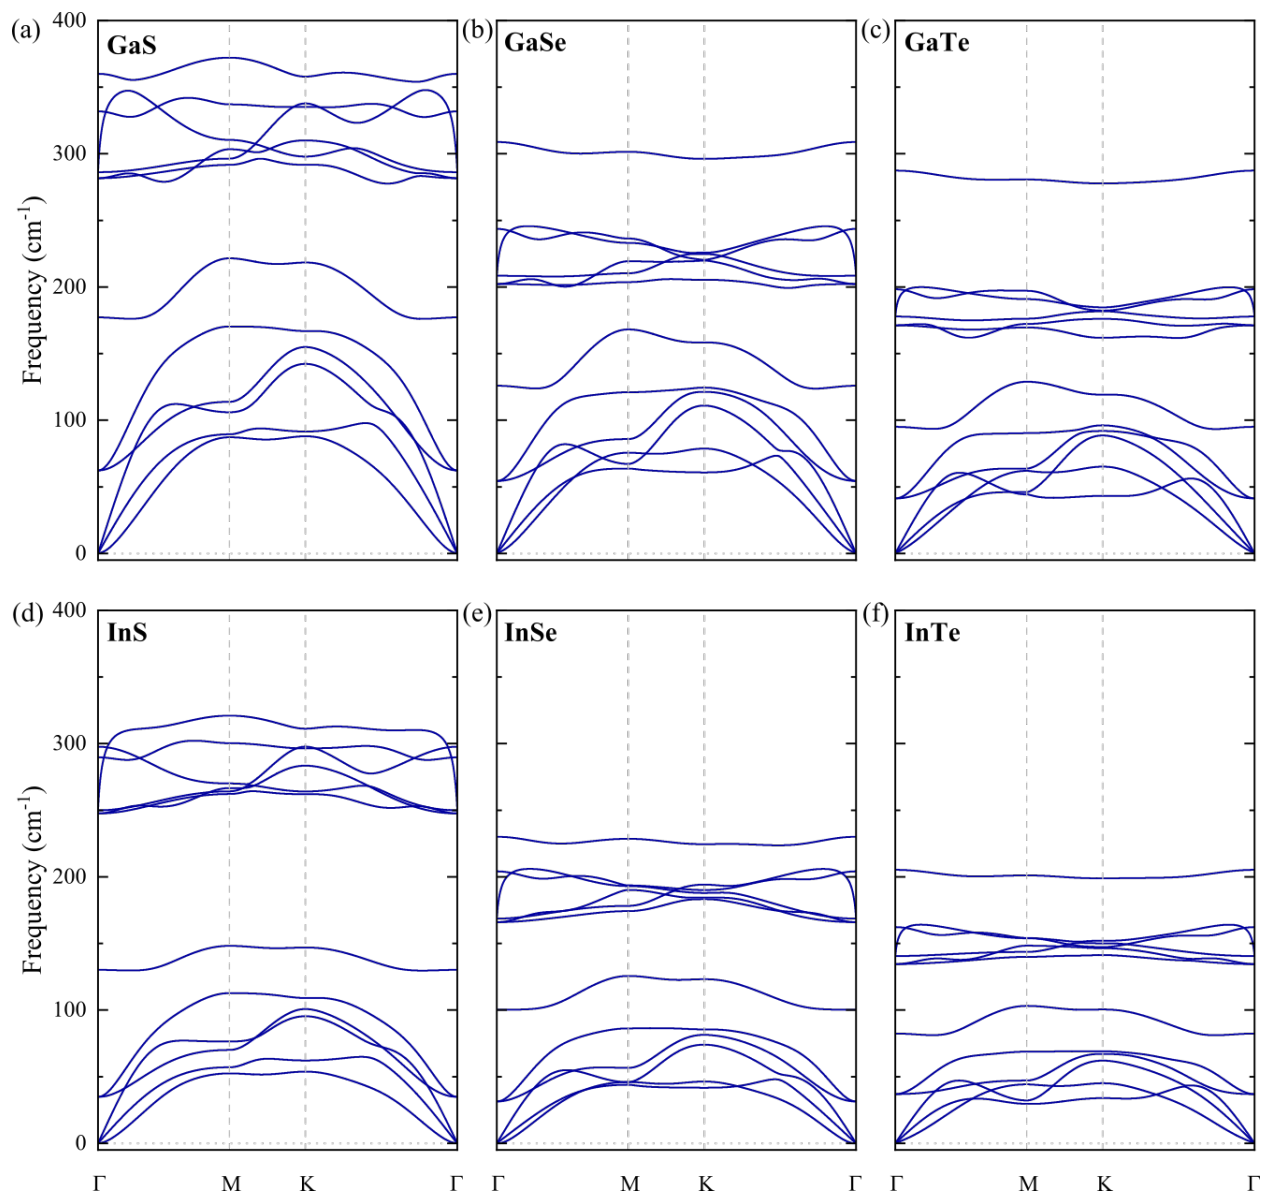

**Figure S5.** Phonon band diagrams of monolayer (a) GaS, (b) GaSe, (c) GaTe, (d) InS, (e) InSe, and (f) InTe.

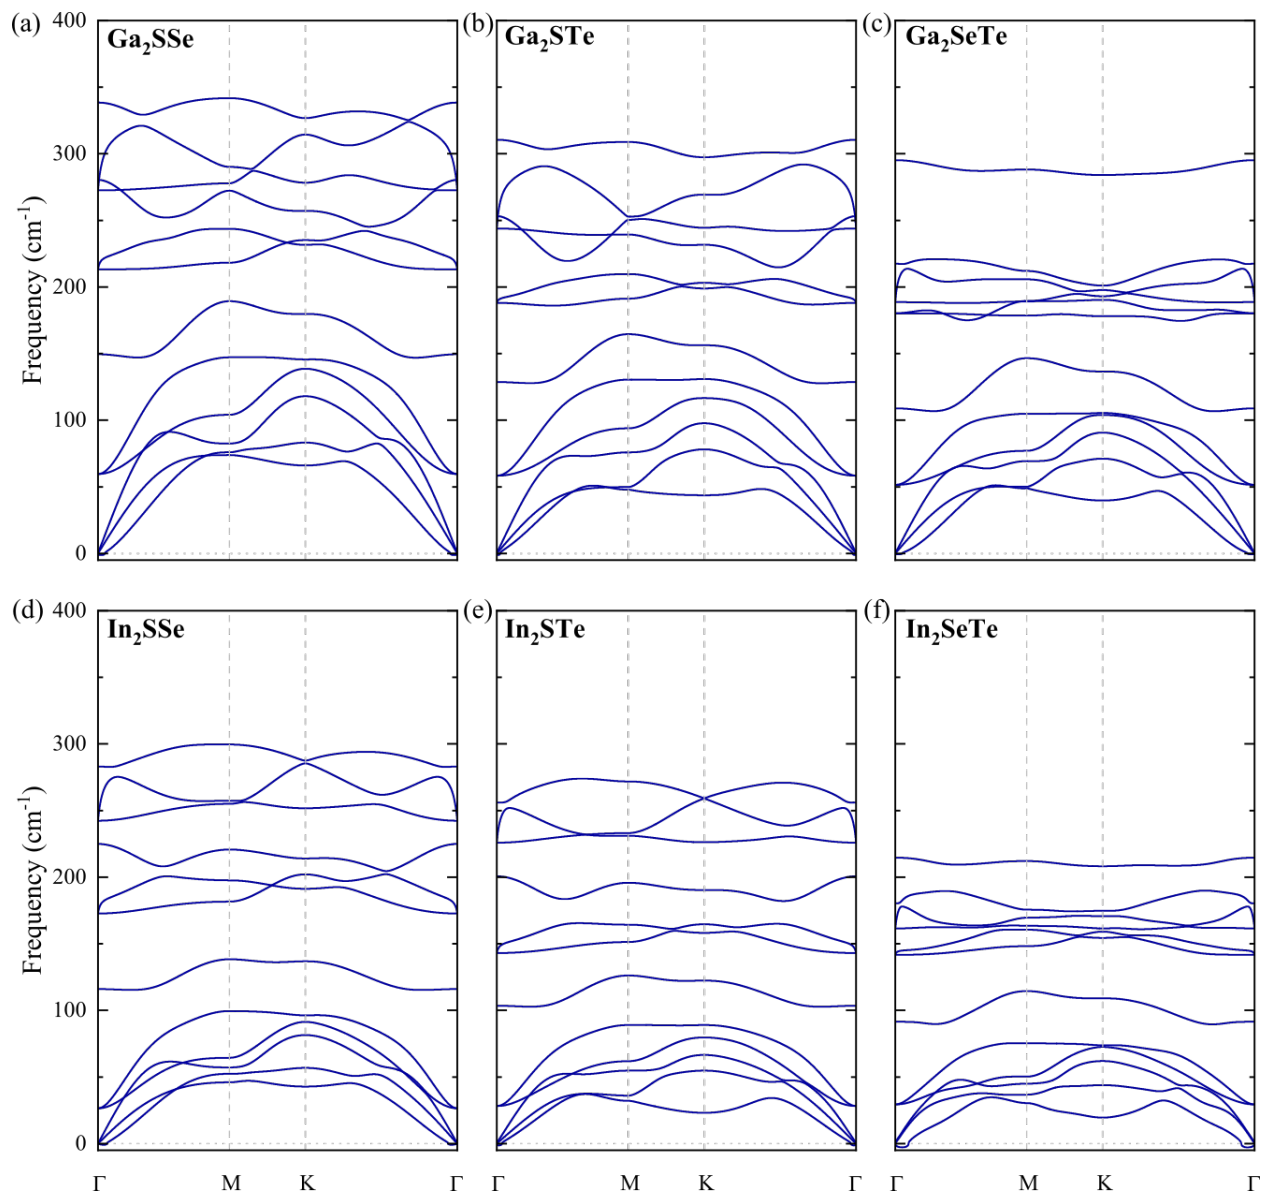

**Figure S6.** Phonon band diagrams of monolayer (a) Ga<sub>2</sub>SSe, (b) Ga<sub>2</sub>STe, (c) Ga<sub>2</sub>SeTe, (d) In<sub>2</sub>SSe, (e) In<sub>2</sub>STe, and (f) In<sub>2</sub>SeTe.

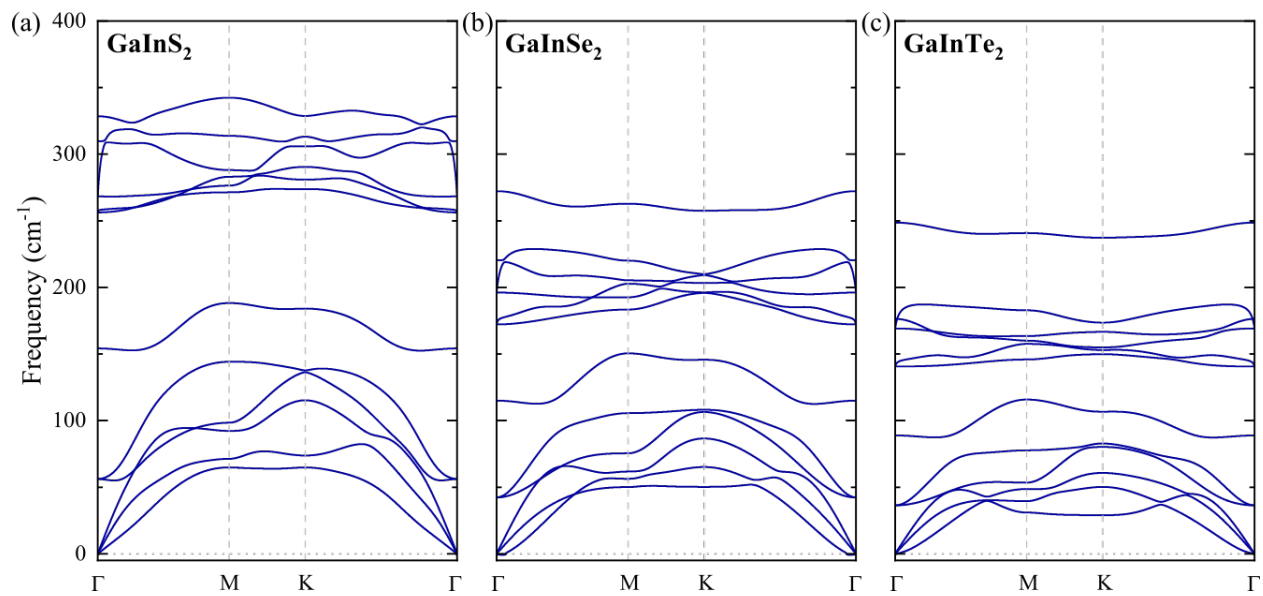

**Figure S7.** Phonon band diagrams of monolayer (a) GaInS<sub>2</sub>, (b) GaInSe<sub>2</sub>, and (c) GaInTe<sub>2</sub>.

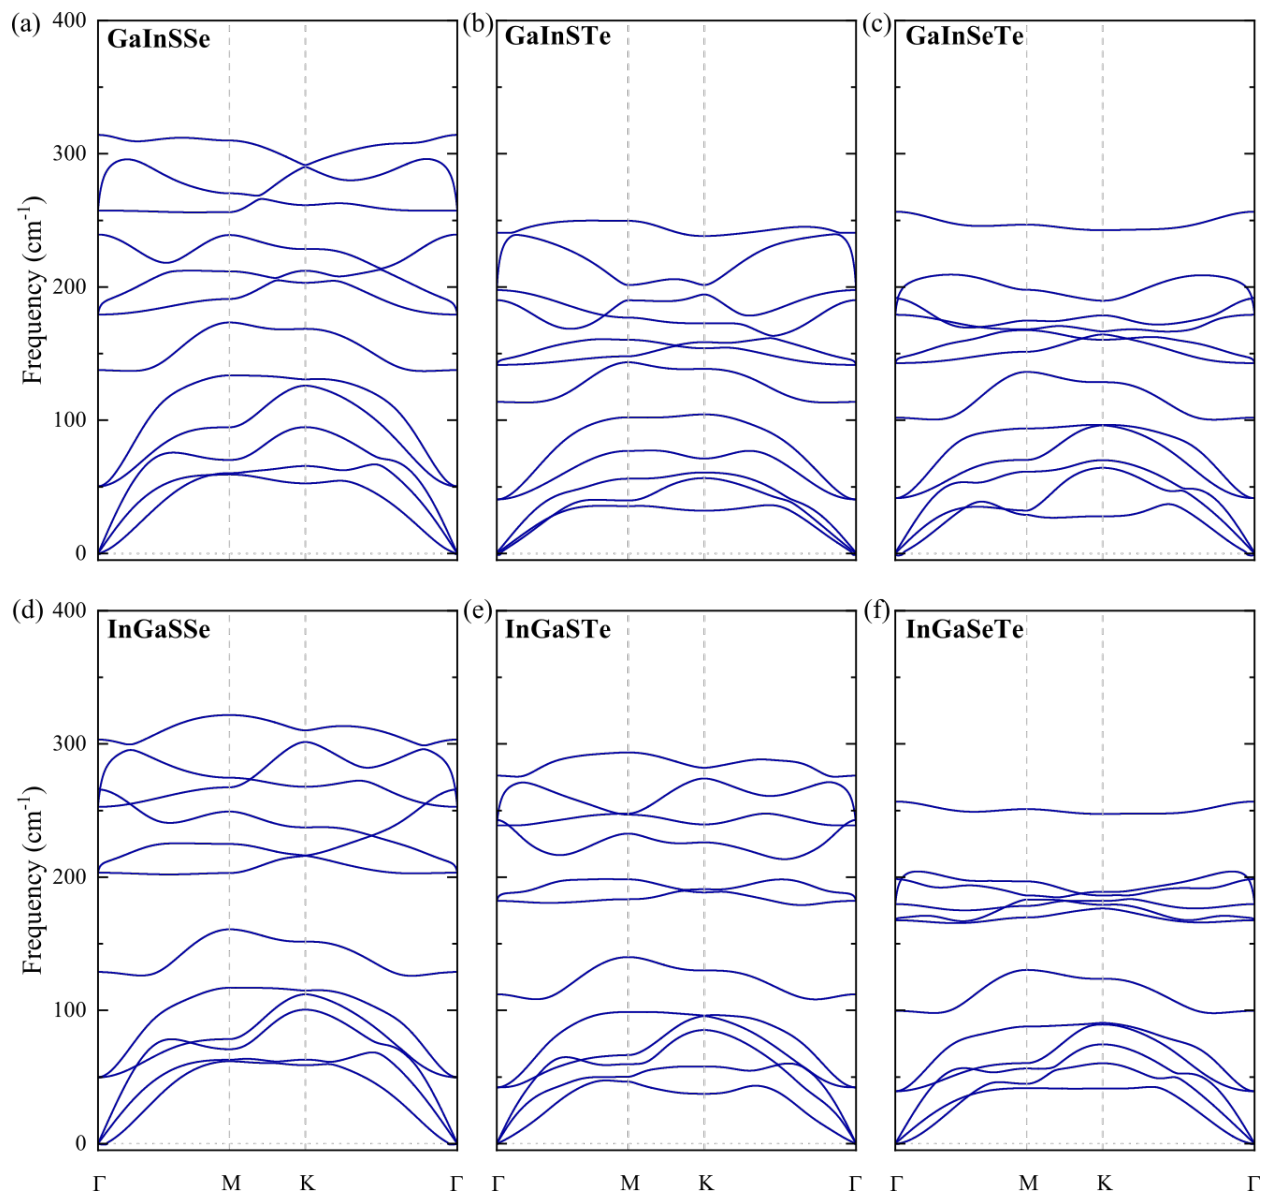

**Figure S8.** Phonon band diagrams of monolayer (a) GaInSSe, (b) GaInSTe, (c) GaInSeTe, (d) InGaSSe, (e) InGaSTe, and (f) InGaSeTe.



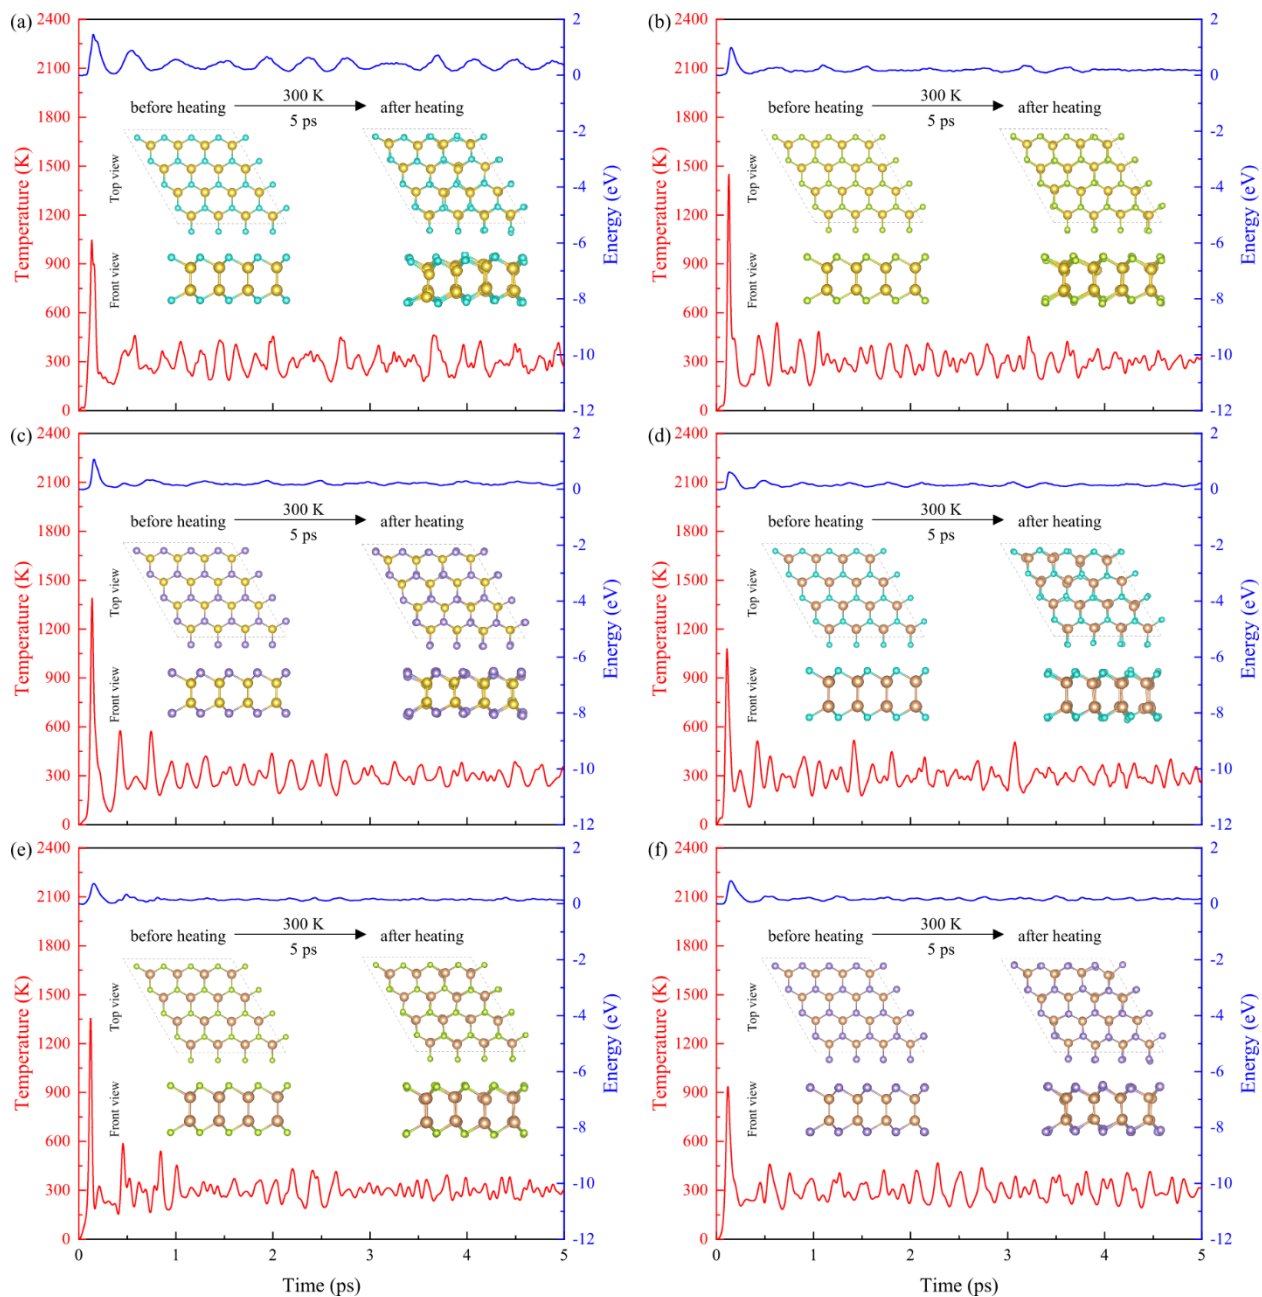

**Figure S9.** AIMD simulations of time-dependent temperature and relative energy fluctuations at room temperature of (a) GaS, (b) GaSe, (c) GaTe, (d) InS, (e) InSe, and (f) InTe monolayers. The insets are the snapshots of the atomic structures before and after heat treatment at 300 K within 5 ps.

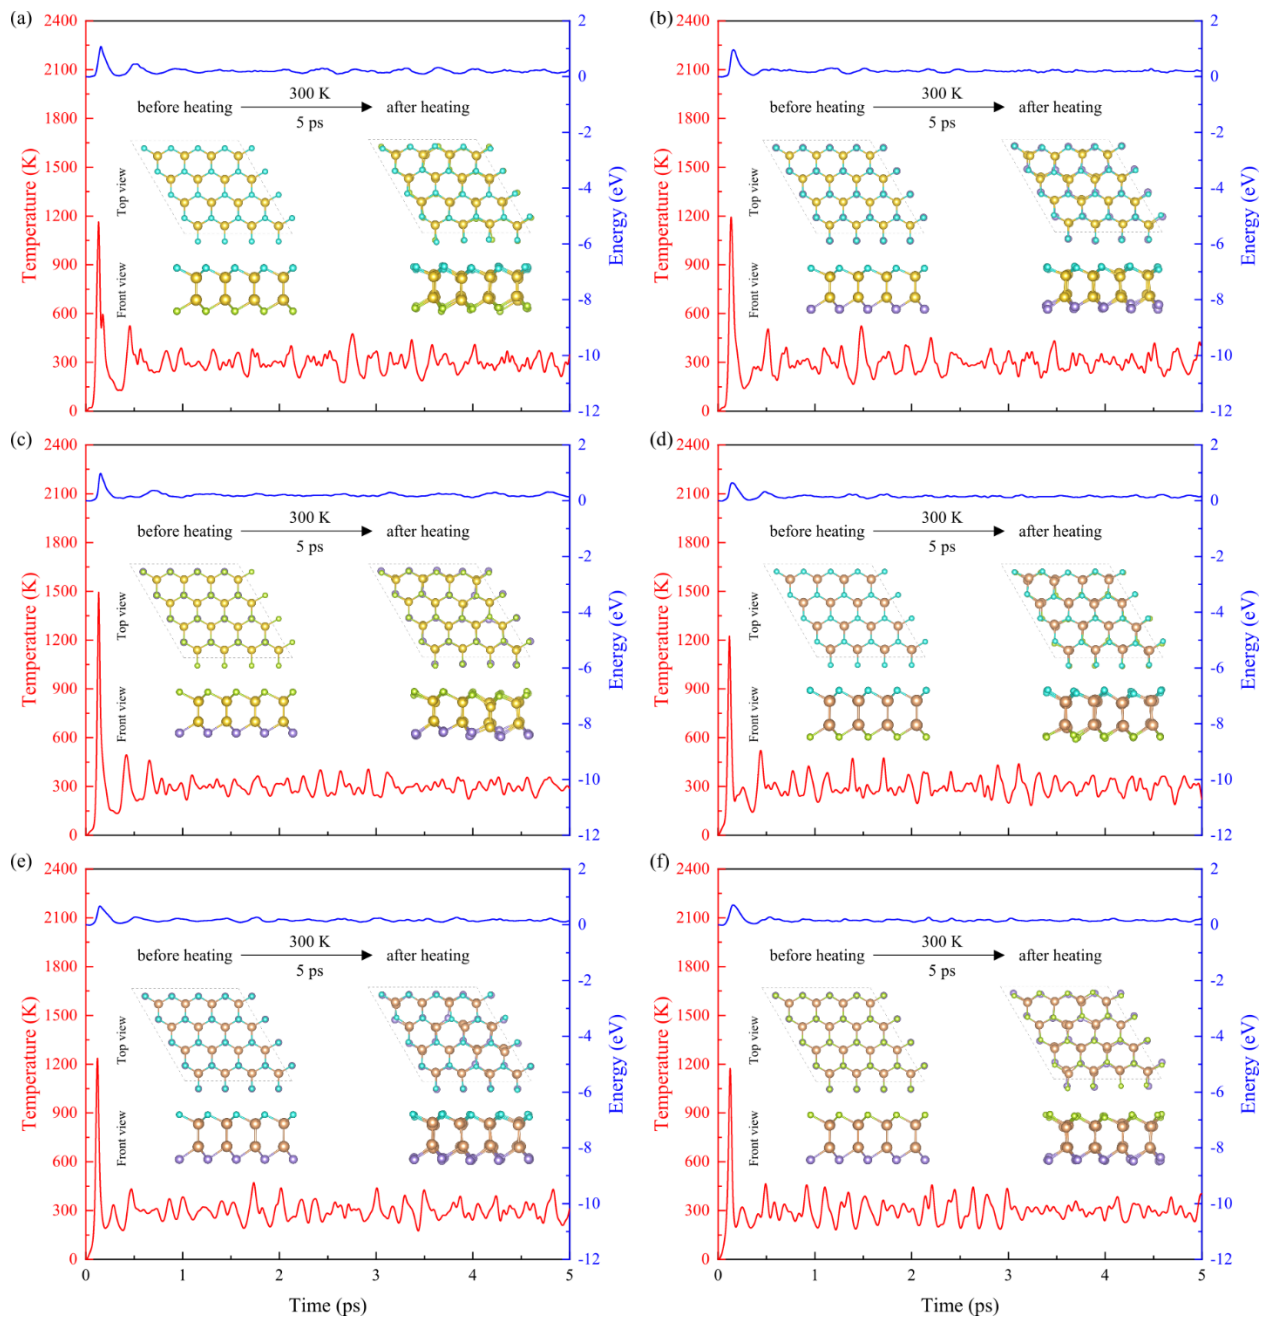

**Figure S10.** AIMD simulations of time-dependent temperature and relative energy fluctuations at room temperature of (a) Ga<sub>2</sub>SSe, (b) Ga<sub>2</sub>STe, (c) Ga<sub>2</sub>SeTe, (d) In<sub>2</sub>SSe, (e) In<sub>2</sub>STe, and (f) In<sub>2</sub>SeTe monolayers. The insets are the snapshots of the atomic structures before and after heat treatment at 300 K within 5 ps.

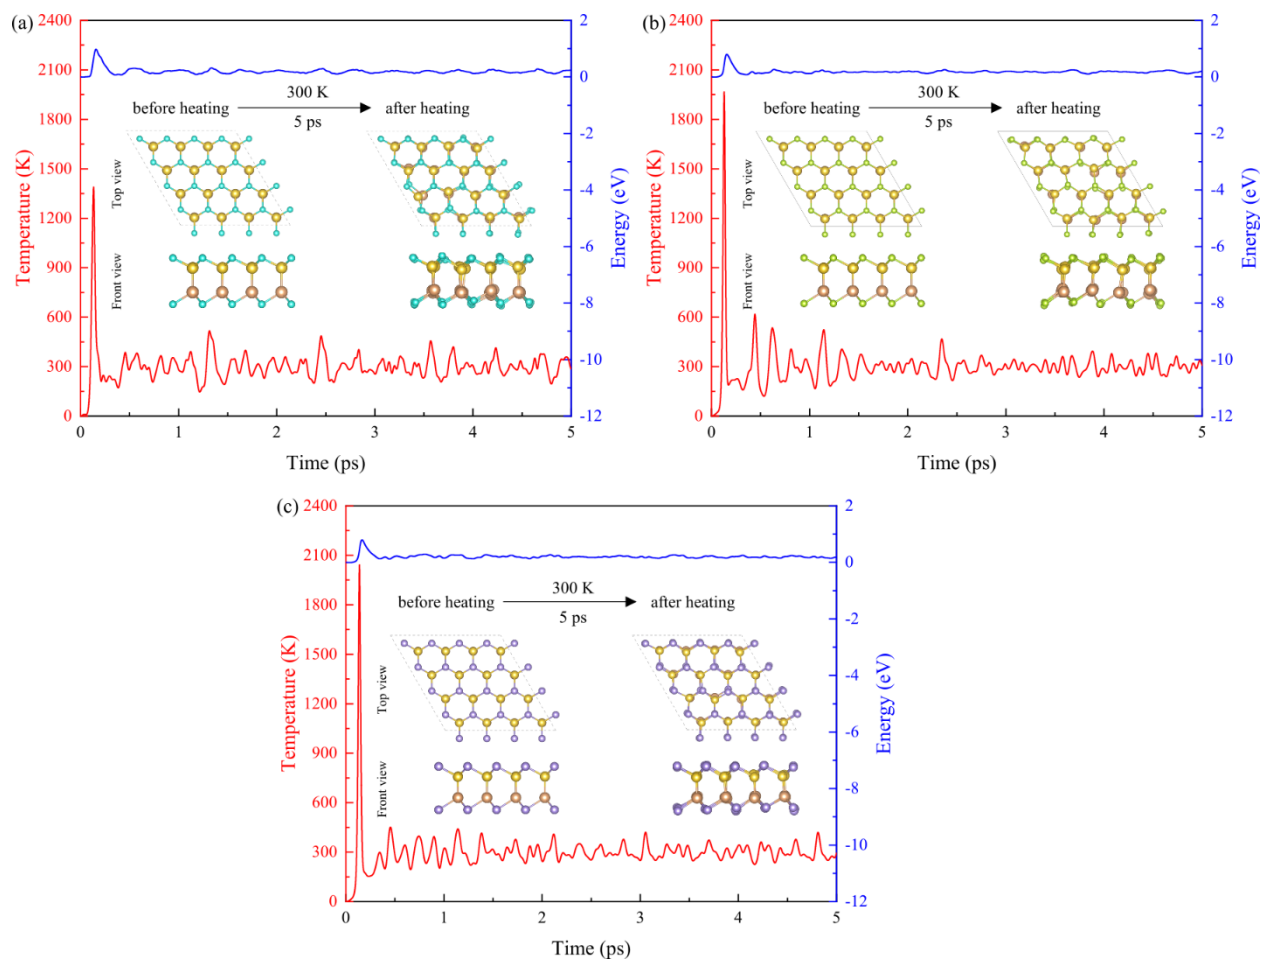

**Figure S11.** AIMD simulations of time-dependent temperature and relative energy fluctuations at room temperature of (a) GaInS<sub>2</sub>, (b) GaInSe<sub>2</sub>, and (c) GaInTe<sub>2</sub> monolayers. The insets are the snapshots of the atomic structures before and after heat treatment at 300 K within 5 ps.

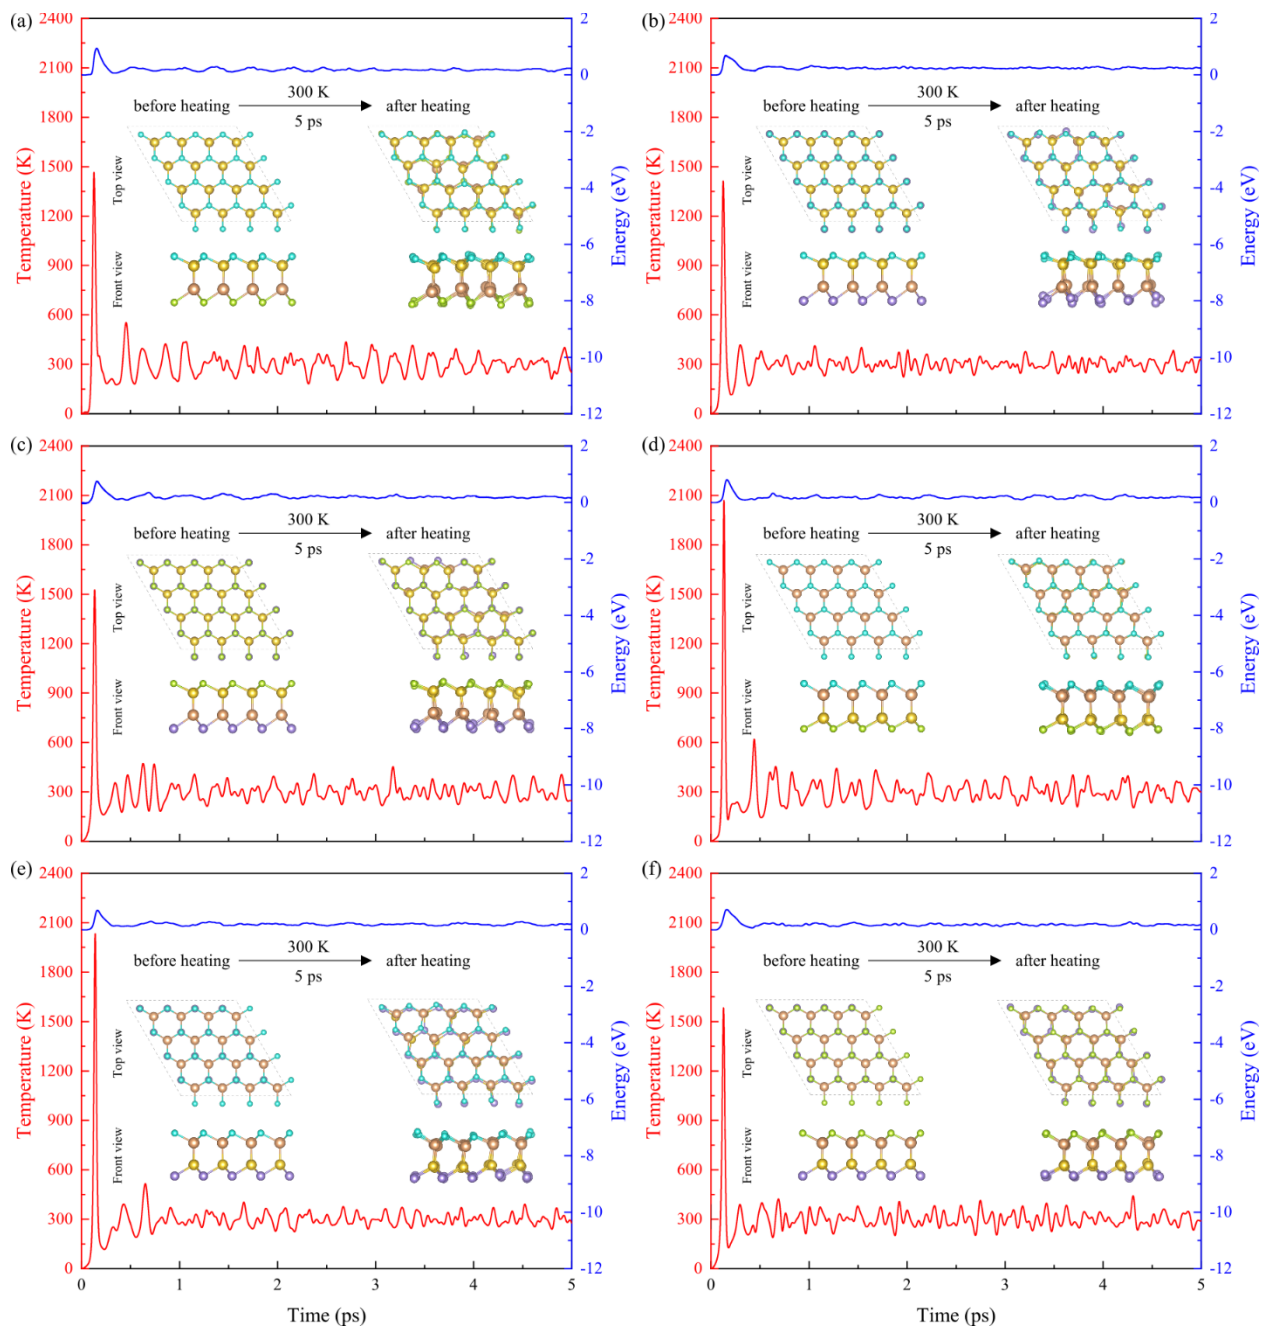

**Figure S12.** AIMD simulations of time-dependent temperature and relative energy fluctuations at room temperature of (a) GaInSSe, (b) GaInSTe, (c) GaInSeTe, (d) InGaSSe, (e) InGaSTe, and (f) InGaSeTe monolayers. The insets are the snapshots of the atomic structures before and after heat treatment at 300 K within 5 ps.

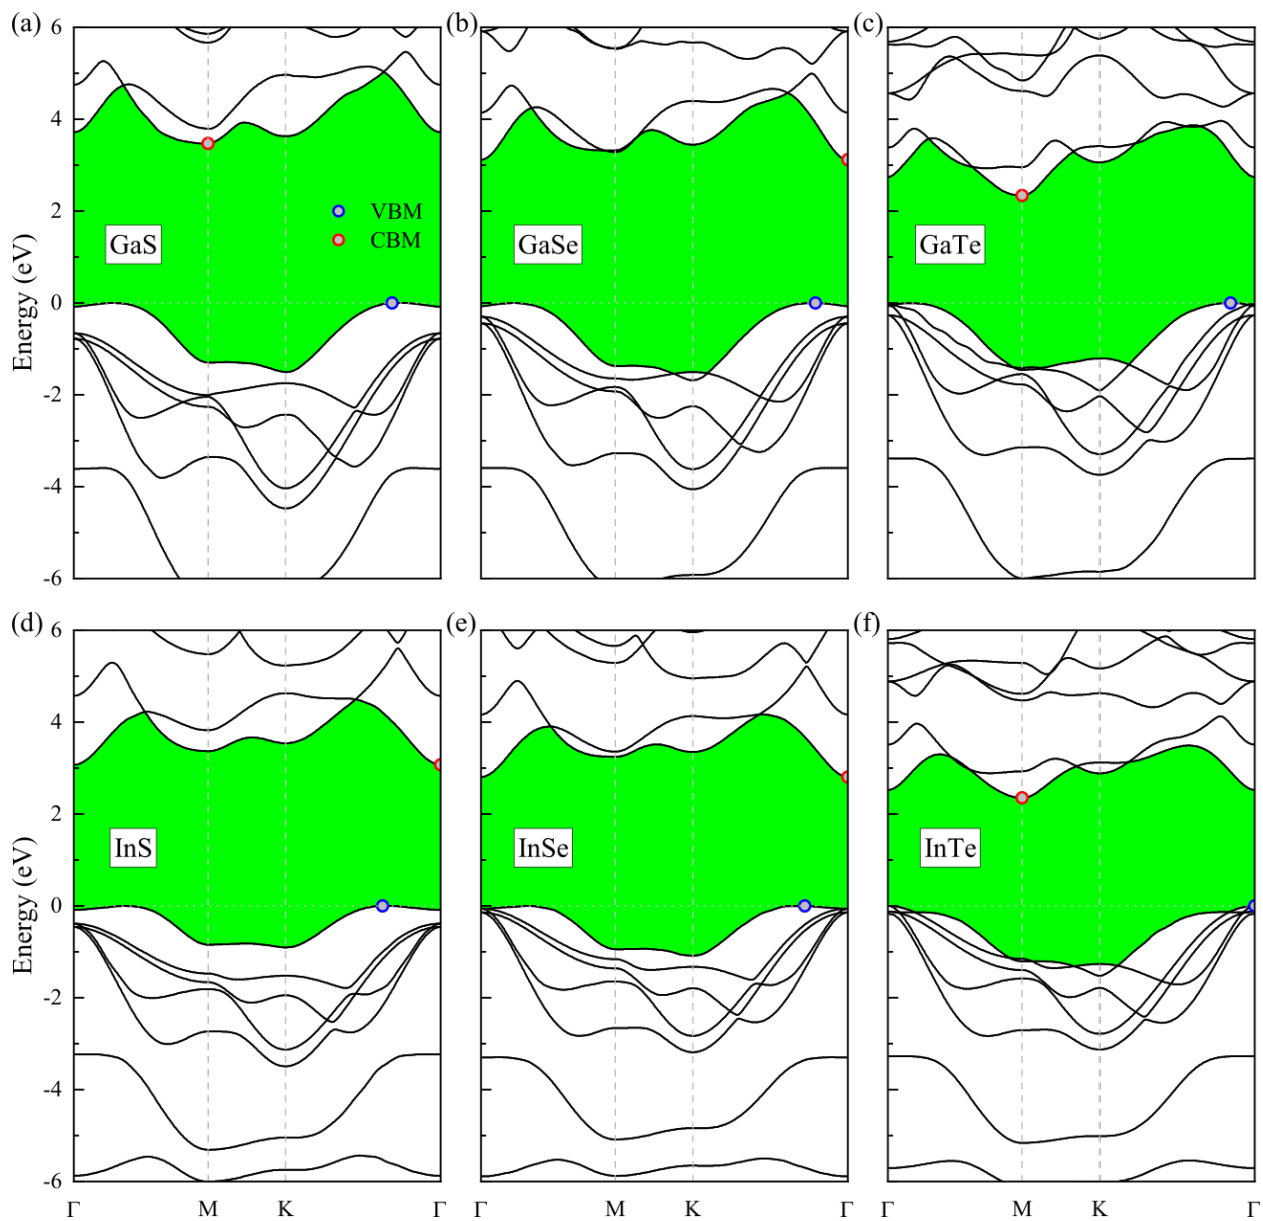

**Figure S13.** Band structures calculated using the HSE method for monolayer (a) GaS, (b) GaSe, (c) GaTe, (d) InS, (e) InSe, and (f) InTe. The valence band maximum is set to zero.

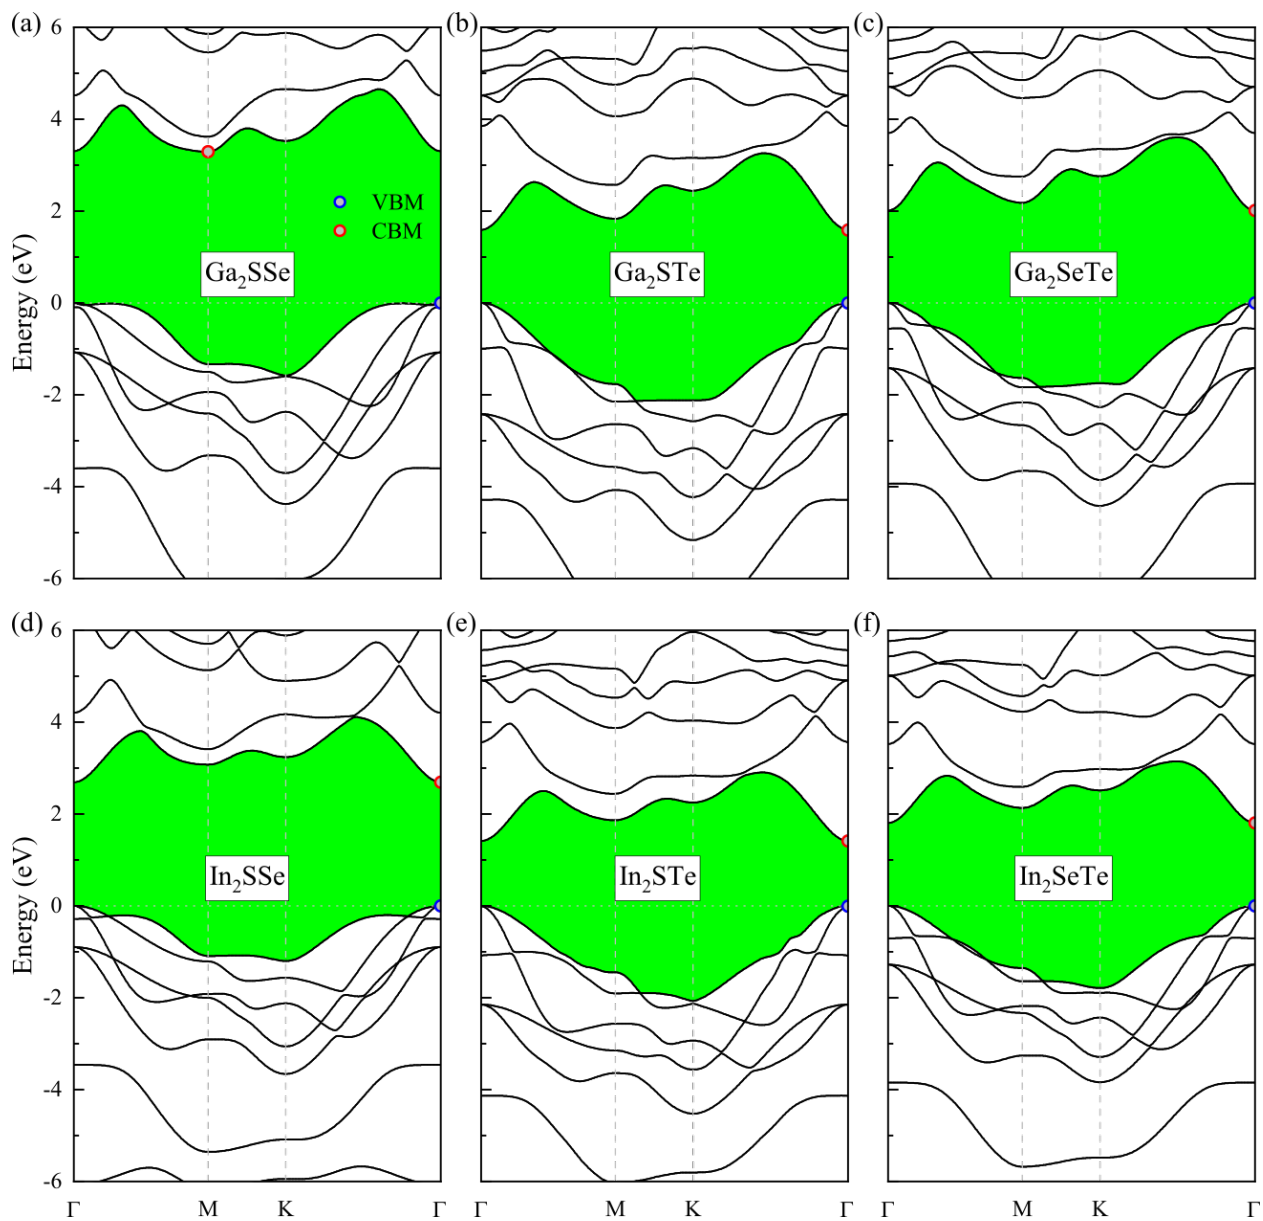

**Figure S14.** Band structures calculated using the HSE method for monolayer (a)  $\text{Ga}_2\text{SSe}$ , (b)  $\text{Ga}_2\text{STe}$ , (c)  $\text{Ga}_2\text{SeTe}$ , (d)  $\text{In}_2\text{SSe}$ , (e)  $\text{In}_2\text{STe}$ , and (f)  $\text{In}_2\text{SeTe}$ . The valence band maximum is set to zero.

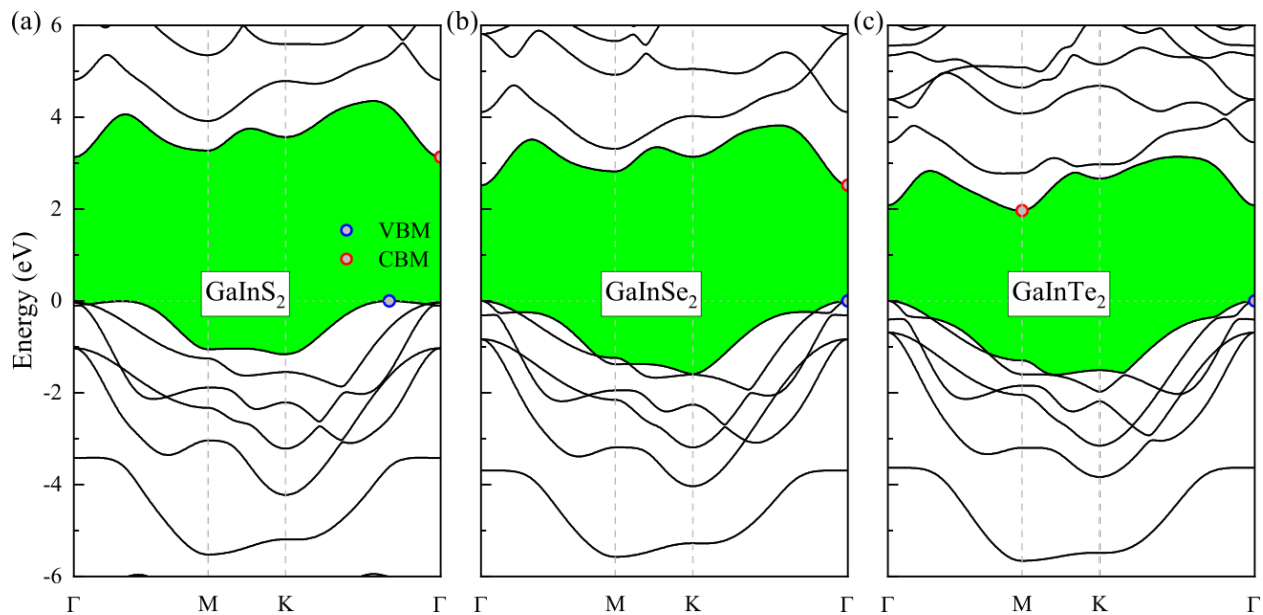

**Figure S15.** Band structures calculated using the HSE method for monolayer (a) GaInS<sub>2</sub>, (b) GaInSe<sub>2</sub>, and (c) GaInTe<sub>2</sub>. The valence band maximum is set to zero.

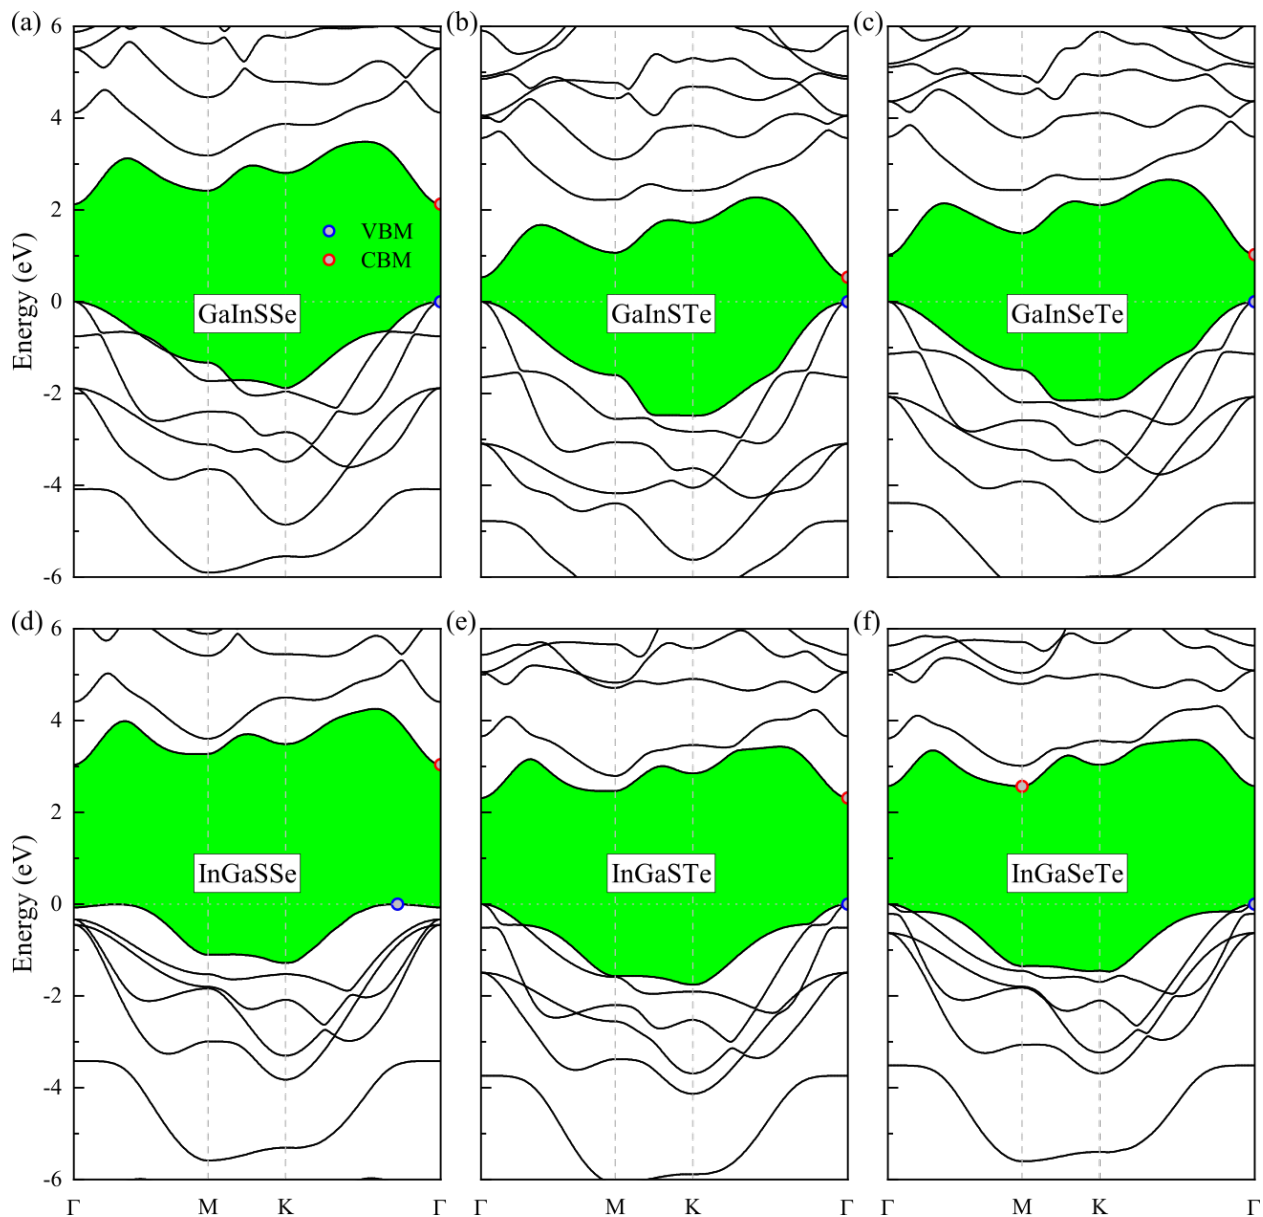

**Figure S16.** Band structures calculated using the HSE method for monolayer (a) GaInS<sub>2</sub>Se, (b) GaInSTe, (c) GaInSeTe, (d) InGaS<sub>2</sub>Se, (e) InGaSTe, and (f) InGaSeTe. The valence band maximum is set to zero.



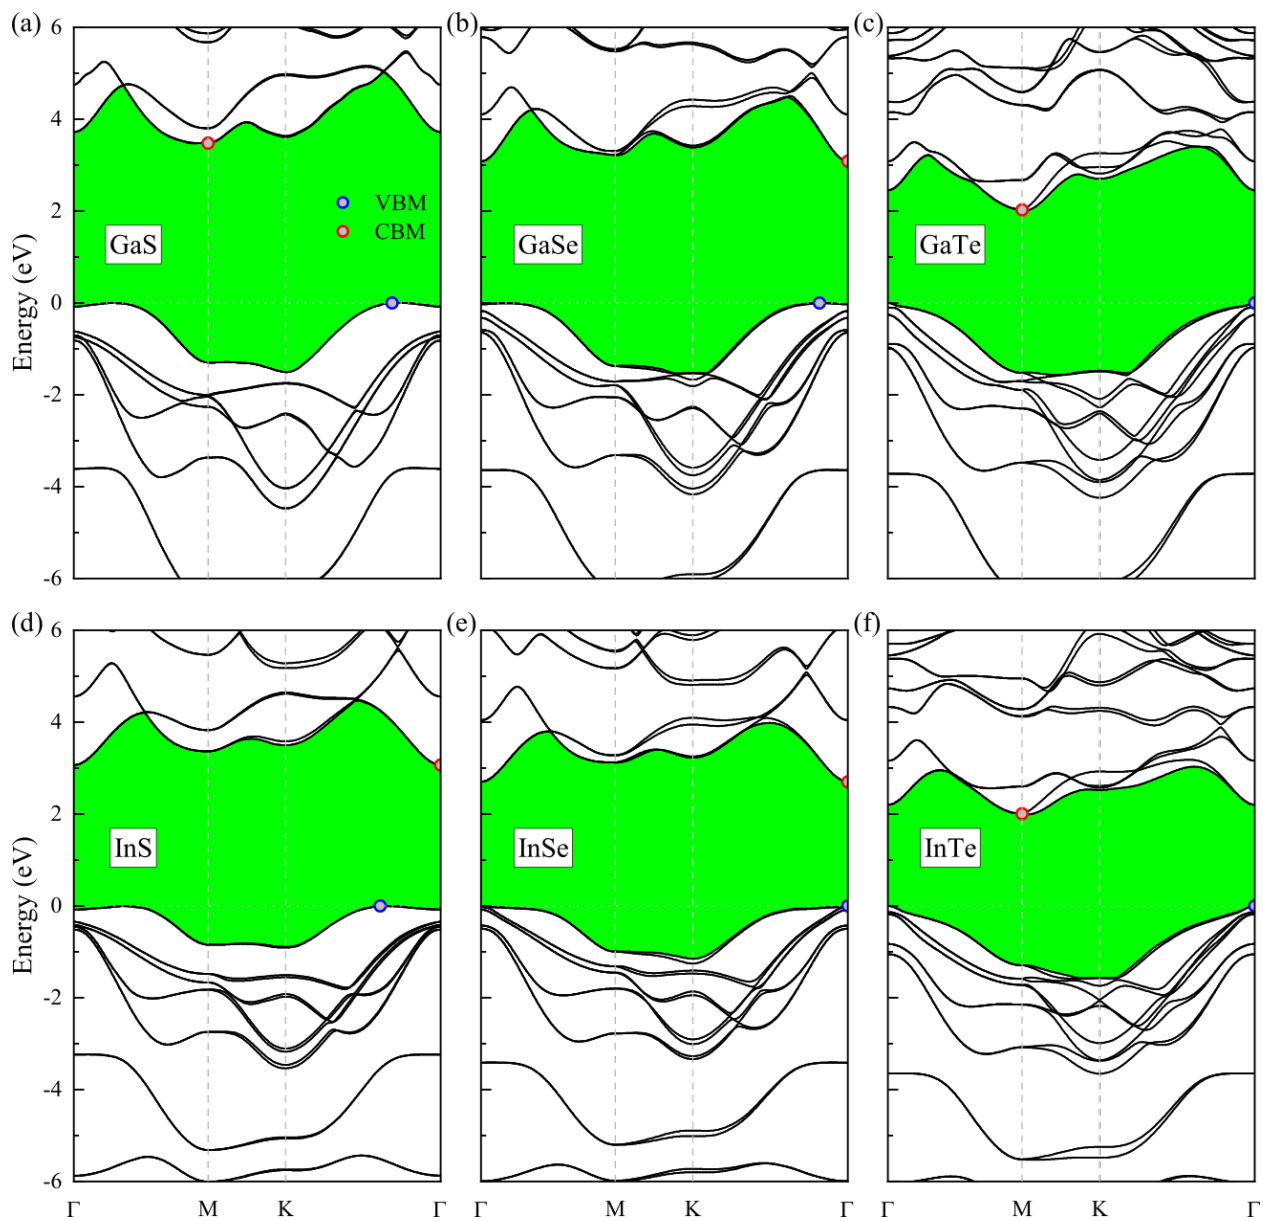

**Figure S17.** Band structures calculated using the HSE+SOC method for monolayer (a) GaS, (b) GaSe, (c) GaTe, (d) InS, (e) InSe, and (f) InTe. The valence band maximum is set to zero.

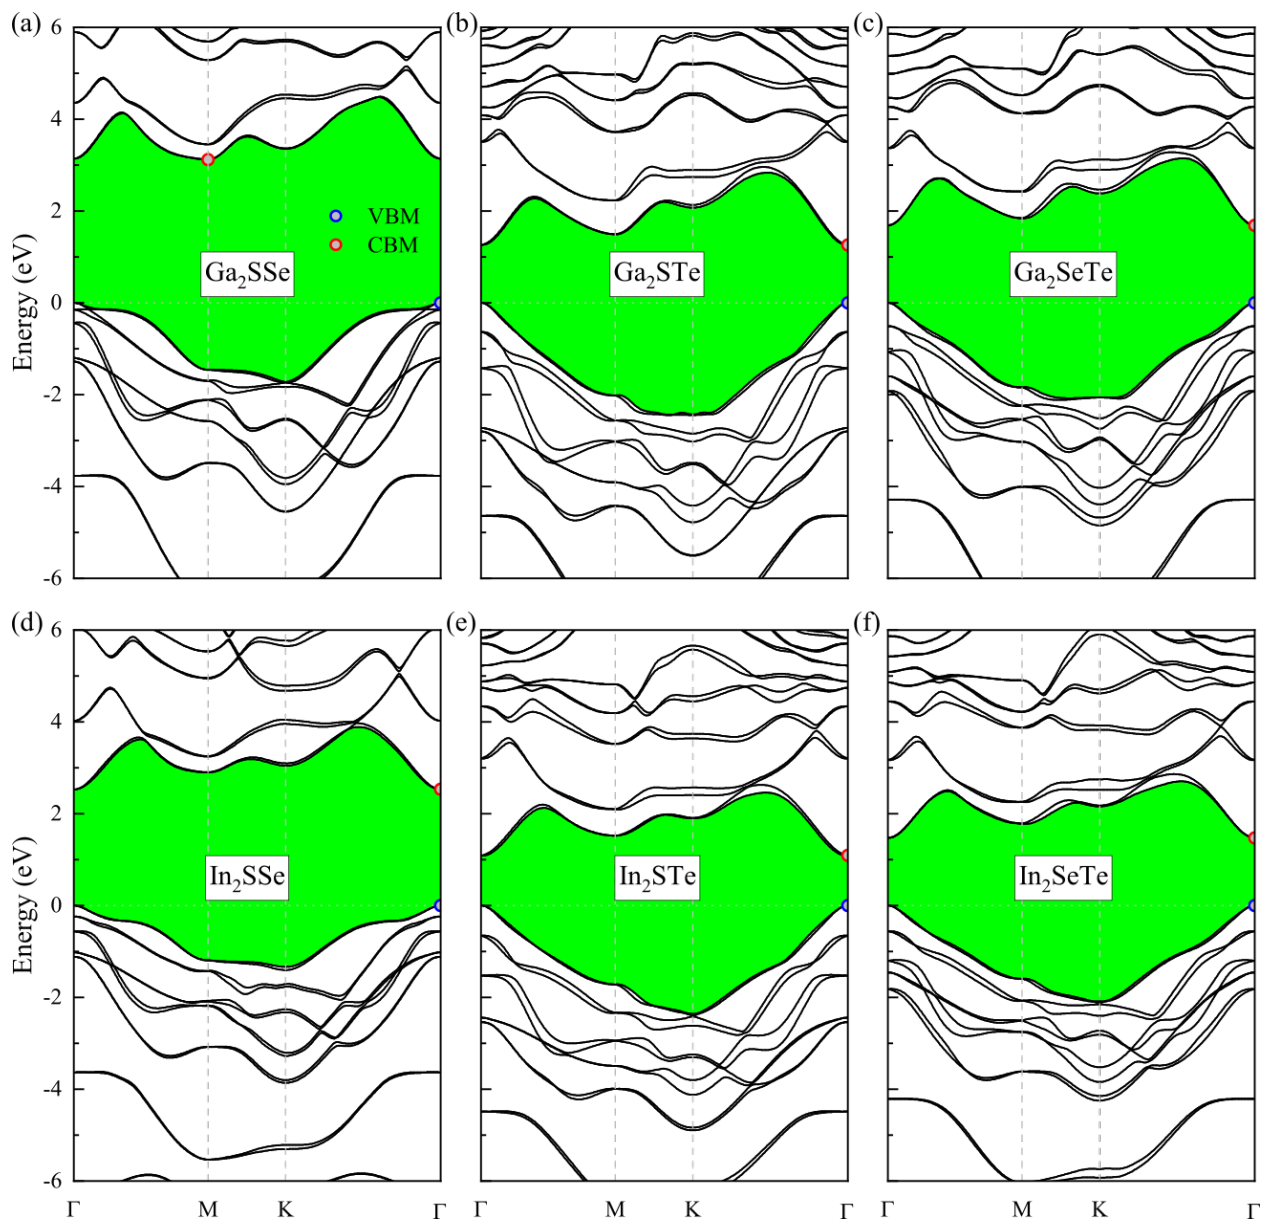

**Figure S18.** Band structures calculated using the HSE+SOC method for monolayer (a) Ga<sub>2</sub>SSe, (b) Ga<sub>2</sub>STe, (c) Ga<sub>2</sub>SeTe, (d) In<sub>2</sub>SSe, (e) In<sub>2</sub>STe, and (f) In<sub>2</sub>SeTe. The valence band maximum is set to zero.

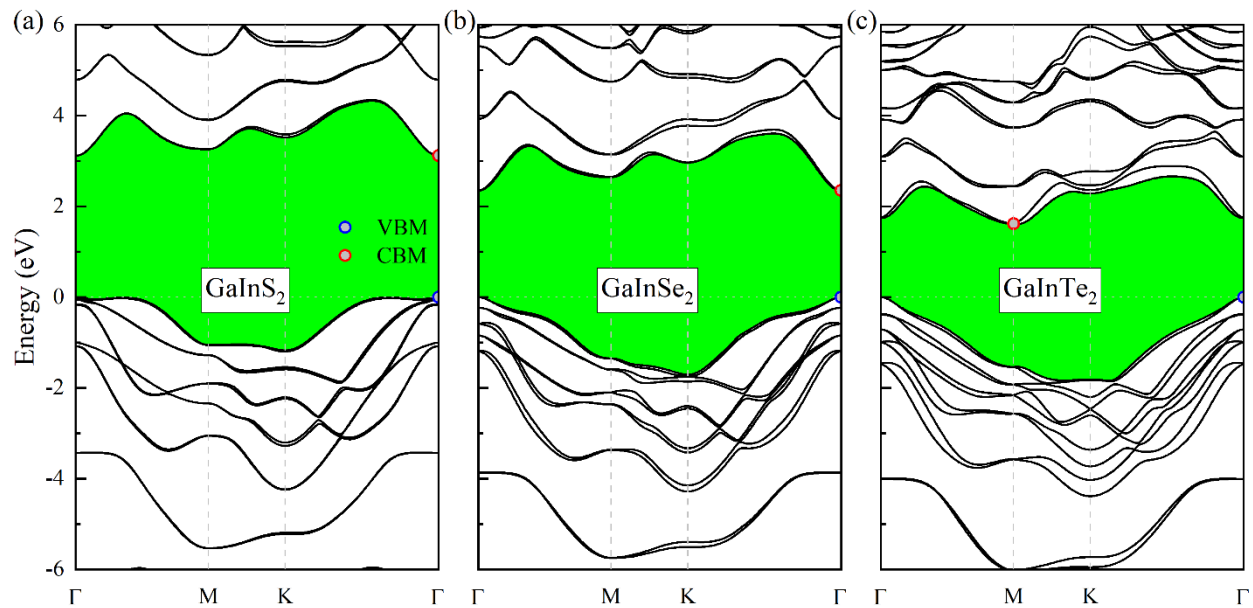

**Figure S19.** Band structures calculated using the HSE+SOC method for monolayer (a) GaInS<sub>2</sub>, (b) GaInSe<sub>2</sub>, and (c) GaInTe<sub>2</sub>. The valence band maximum is set to zero.

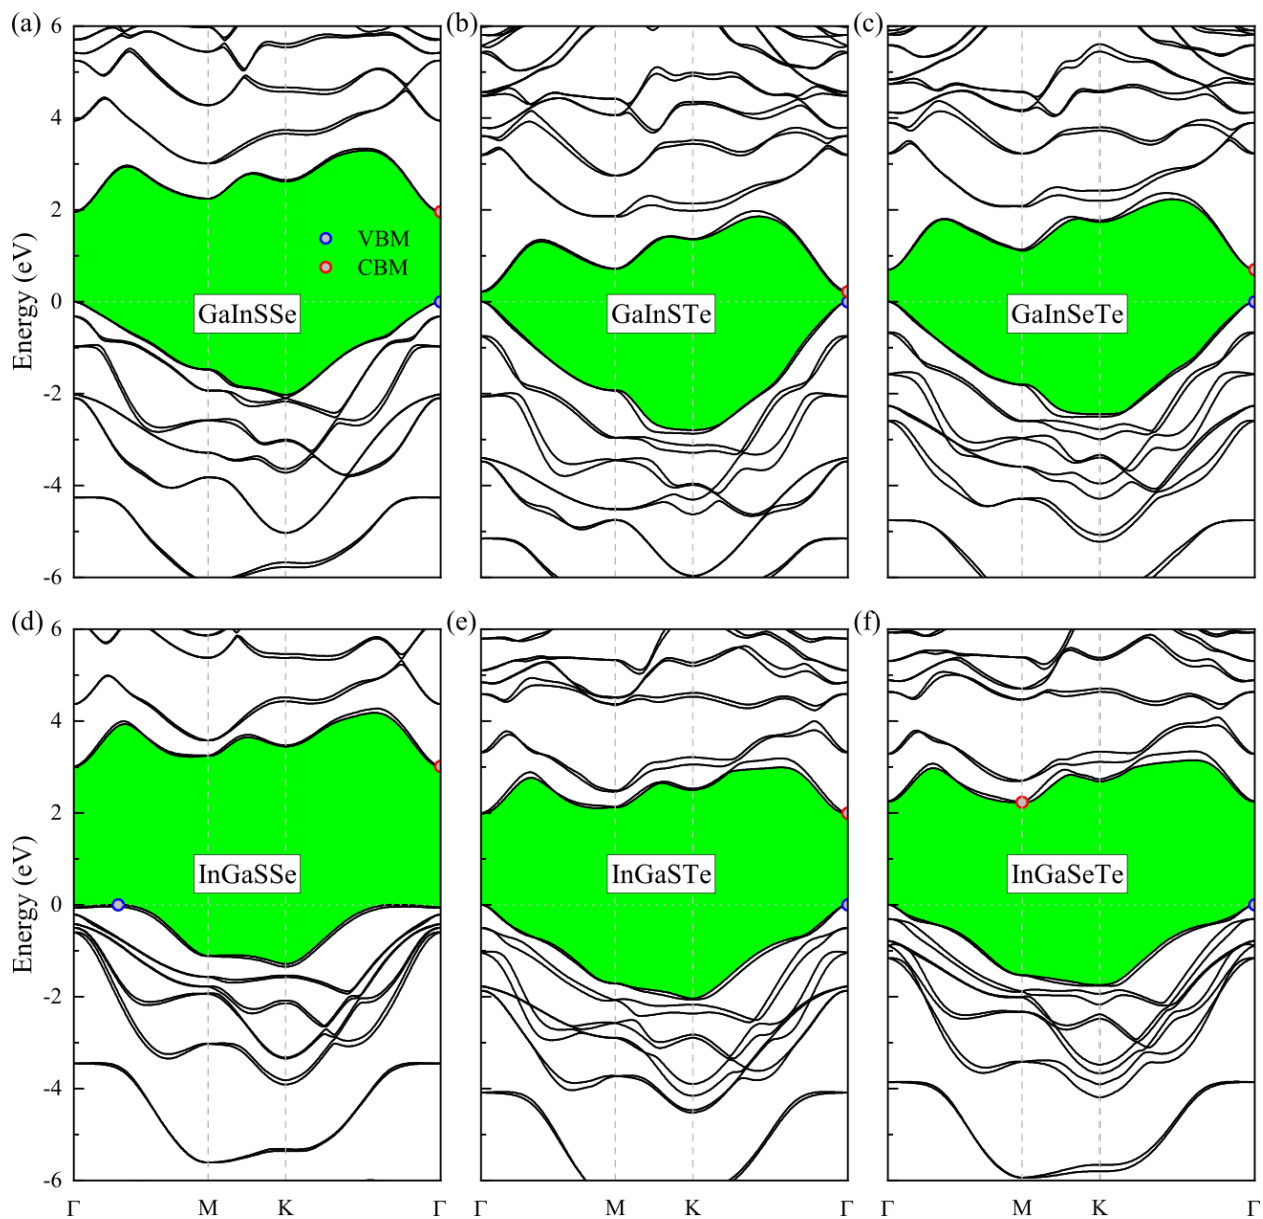

**Figure S20.** Band structures calculated using the HSE+SOC method for monolayer (a) GaInSSe, (b) GaInSTe, (c) GaInSeTe, (d) InGaSSe, (e) InGaSTe, and (f) InGaSeTe. The valence band maximum is set to zero.

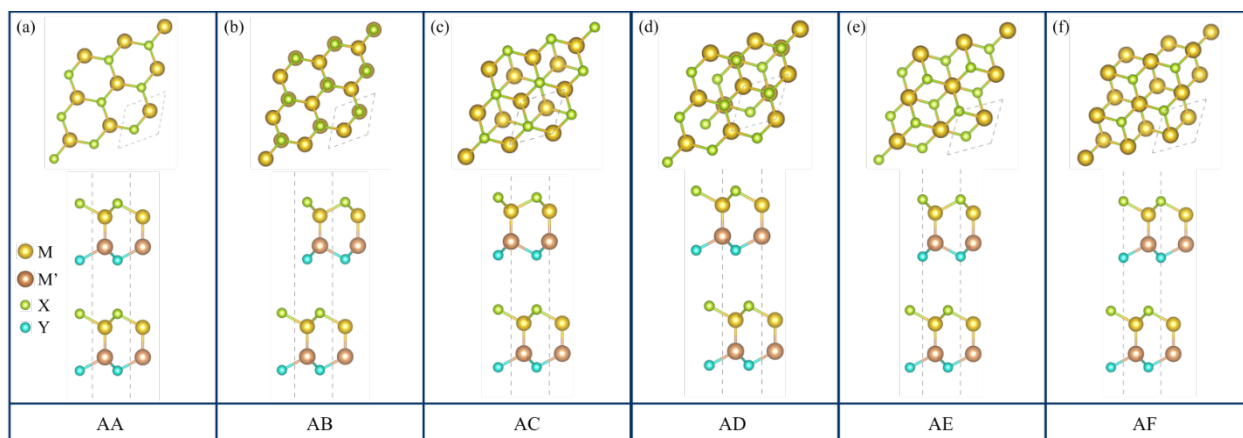

**Figure S21.** Top and side views of Janus group-III vdW heterostructure with six possible stacking configurations.

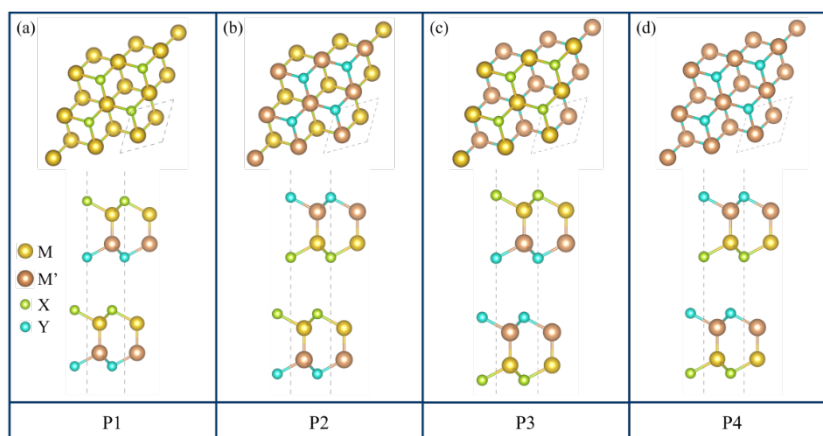

**Figure S22.** Top and side views of Janus group-III vdW heterostructure with four distinct interfacial patterns.

## REFERENCES

- [1] T. V. Vu, C. V. Nguyen, H. V. Phuc, A. Lavrentyev, O. Khyzhun, N. V. Hieu, M. Obeid, D. Rai, H. D. Tong and N. N. Hieu, Theoretical prediction of electronic, transport, optical, and thermoelectric properties of Janus monolayers  $\text{In}_2\text{XO}$  ( $X = \text{S}, \text{Se}, \text{Te}$ ), *Physical Review B*, 2021, 103, 085422.
- [2] S. Hastrup, M. Strange, M. Pandey, T. Deilmann, P. S. Schmidt, N. F. Hinsche, M. N. Gjerding, D. Torelli, P. M. Larsen, A. C. Riis-Jensen, and J. Gath, The Computational 2D Materials Database: high-throughput modeling and discovery of atomically thin crystals, *2D Materials*, 2018, 5(4), 042002.
- [3] M. N. Gjerding, A. Taghizadeh, A. Rasmussen, S. Ali, F. Bertoldo, T. Deilmann, N. R. Knøsgaard, M. Kruse, A. H. Larsen, S. Manti, and T. G. Pedersen, Recent progress of the computational 2D materials database (C2DB), *2D Materials*, 2021, 8(4), 044002.
